## Human Fronto-Striatal Connectivity is Organized into Discrete Functional Subnetworks

Evan M. Gordon<sup>1,18</sup>, Timothy O. Laumann<sup>2</sup>, Scott Marek<sup>2</sup>, Dillan J. Newbold<sup>3</sup>, Jacqueline M. Hampton<sup>2</sup>, Nicole A. Seider<sup>3</sup>, David F. Montez<sup>3</sup>, Ashley M. Nielsen<sup>17</sup>, Andrew N. Van<sup>7</sup>, Annie Zheng<sup>3</sup>, Ryland Miller<sup>2,3</sup>, Joshua S. Siegel<sup>2</sup>, Benjamin P. Kay<sup>3</sup>, Abraham Z. Snyder<sup>1,3</sup>, Deanna J. Greene<sup>9</sup>, Bradley L. Schlaggar<sup>10-12</sup>, Steven E. Petersen<sup>1,3-5</sup>, Steven M. Nelson<sup>13-16</sup>, Nico U.F. Dosenbach<sup>1,3,6-8</sup>

Departments of <sup>1</sup>Radiology, <sup>2</sup>Psychiatry, <sup>3</sup>Neurology, <sup>4</sup>Neuroscience, <sup>5</sup>Psychological & Brain Sciences, <sup>6</sup>Pediatrics, <sup>7</sup>Biomedical Engineering, and <sup>8</sup>Program in Occupational Therapy Washington University School of Medicine, St. Louis, MO, 63110

<sup>9</sup>Department of Cognitive Science, University of California San Diego, La Jolla, CA 92093

<sup>10</sup>Kennedy Krieger Institute, Baltimore, MD 21205

Departments of <sup>11</sup>Neurology and <sup>12</sup>Pediatrics, Johns Hopkins University School of Medicine, Baltimore, MD 21205

<sup>13</sup>VISN 17 Center of Excellence for Research on Returning War Veterans, Waco, TX 76711

<sup>14</sup>Center for Vital Longevity, School of Behavioral and Brain Sciences, University of Texas at Dallas, Dallas, TX 75235

<sup>15</sup>Department of Psychology and Neuroscience, Baylor University, Waco, TX 76789

<sup>16</sup>Department of Psychiatry and Behavioral Science, Texas A&M Health Science Center, Bryan, TX 77807

<sup>17</sup>Institute for Innovations in Developmental Sciences, Northwestern University, Chicago, IL 60611

<sup>18</sup>Lead contact

Correspondence: [egordon@wustl.edu](mailto:egordon@wustl.edu) (E.M.G.)

1  
2  
3  
4  
5  
6  
7  
8  
9  
10  
11  
12  
13  
14  
15  
16  
17  
18  
19  
20  
21  
22  
23

## **Abstract**

The striatum is interconnected with the cerebral cortex via multiple recurrent loops that play a major role in many neuropsychiatric conditions. Primate cortico-striatal connections can be precisely mapped using invasive tract-tracing. However, noninvasive human research has not mapped these connections with anatomical precision, limited by the practice of averaging neuroimaging data across individuals. Here we utilized highly-sampled resting-state functional connectivity MRI for individually-specific precision functional mapping of cortico-striatal connections. We identified ten discrete, individual-specific subnetworks linking cortex—predominately frontal cortex—to striatum. These subnetworks included previously unknown striatal connections to the human language network. The discrete subnetworks formed a stepped rostral-caudal gradient progressing from nucleus accumbens to posterior putamen; this organization was strongest for projections from medial frontal cortex. The stepped gradient organization fit patterns of fronto-striatal connections better than a smooth, continuous gradient. Thus, precision subnetworks identify detailed, individual-specific stepped gradients of cortico-striatal connectivity that include human-specific language networks.

## **Keywords**

fMRI, individual variability, striatum, functional connectivity, brain networks

1  
2 **INTRODUCTION**

3  
4  
5 The striatum (putamen, caudate, nucleus accumbens, and globus pallidus) is critically important  
6 for optimizing and executing goal-directed behaviors across multiple modalities (Cohen and Frank,  
7 2009; Haber, 2016), ranging from motor planning and control (Grillner et al., 2005), to manipulation  
8 of items in working memory (Frank et al., 2001), to complex value judgments (Schultz et al., 1998;  
9 Schultz and Dickinson, 2000). The striatum works in close concert with the cortex—and especially  
10 the frontal cortex—via a series of parallel, partially segregated cortico-striato-thalamo-cortical  
11 circuits (Haber, 2003; Nakano et al., 2000). The integrity of cortico-striatal connectivity is critical for  
12 healthy brain function, as its disruption causes devastating neurological and psychiatric symptoms  
13 in disorders such as Parkinson’s and Huntington’s disease (Blumenstock and Dudanova, 2020;  
14 Bunner and Rebec, 2016). Even relatively minor alterations in cortico-striatal circuitry are thought to  
15 play a major role in symptoms observed in Tourette syndrome (Greene et al., 2017; Mink, 2001),  
16 schizophrenia (Simpson et al., 2010), obsessive-compulsive disorder (Harrison et al., 2009),  
17 depression (Borsini et al., 2020), and autism (Li and Pozzo-Miller, 2019). However, cortico-striatal  
18 circuits are some of the least well-understood pathways in the human brain, as their striatal  
19 elements are small and exceedingly difficult to dissociate from each other using non-invasive  
20 imaging. Precise, detailed, individual-specific characterization of cortico-striatal circuits is a  
21 fundamental first step to understanding how they help generate complex behaviors, and is vitally  
22 important for treating many neurodegenerative and neuropsychiatric disorders, especially with  
23 targeted neurostimulation (e.g., using deep brain stimulation [DBS], or focused ultrasound).

24 Non-human primate research using autoradiographic tracer injections has demonstrated that  
25 the striatum receives topographically ordered projections from a wide variety of cortical sources  
26 (Cavada and Goldman-Rakic, 1991; Cheng et al., 1997; Chikama et al., 1997; Selemon and  
27 Goldman-Rakic, 1988, 1985; Steele and Weller, 1993; Van Hoesen et al., 1981; Webster et al.,

1 1993; Yeterian and Pandya, 1998, 1993; Yeterian and Van Hoesen, 1978), though projections from  
2 frontal cortex are thought to be the main input driving striatal function (Haber, 2003). Non-human  
3 primate fronto-striatal circuits have an ordered organization that is mirrored in striatum and cerebral  
4 cortex (Haber, 2016). Specifically, rostral portions of frontal cortex project to punctate regions within  
5 rostral striatum (Haber et al., 1995; Kunishio and Haber, 1994), while progressively more caudal  
6 frontal cortex projects to progressively caudal striatal targets (Averbeck et al., 2014; Calzavara et  
7 al., 2007; Flaherty and Graybiel, 1994, p. 1975; Künzle, 1975; Selemon and Goldman-Rakic, 1985).

8 The fronto-striatal organization observed in non-human primates is largely assumed to have  
9 been conserved in the human brain (Haber, 2016). However, the complex cognitive and psychiatric  
10 symptoms caused by striatal dysfunction point towards human-specific aspects of fronto-striatal  
11 connectivity. Further, relative to non-human primates, the prefrontal cortex is expanded in humans  
12 (Smaers et al., 2011), and pathways for language processing have developed (Dick and Tremblay,  
13 2012; Friederici, 2017). It is unknown how human-specific circuits integrate into fronto-striatal  
14 organization.

15 Precisely mapping human fronto-striatal connections with non-invasive imaging has been  
16 challenging. Techniques such as diffuse optical tomography, electroencephalography, and  
17 magnetoencephalography cannot obtain signal from the brain center. MRI-based techniques such  
18 as resting-state functional connectivity (RSFC), which involves identifying correlated patterns of  
19 activity in spatially distant regions of the brain (Biswal et al., 1995), have proven successful in  
20 describing the brain's network organization (Power et al., 2011; Yeo et al., 2011). However, these  
21 techniques suffer rapid drop-off of signal-to-noise (SNR) ratios as distance increases from the head  
22 coil. Standard approaches for overcoming low SNR in the brain center require registering study  
23 participants to a common atlas and averaging their data. Such group-averaged neuroimaging  
24 studies have been limited to describing broad, nonspecific connections between large swaths of  
25 striatum and widespread regions of cortex, distributed large-scale networks, or entire cortical lobes  
26 (Badre and Frank, 2012; Choi et al., 2012; Di Martino et al., 2008; Draganski et al., 2008; Greene et

1 al., 2014; Jarbo and Verstynen, 2015; Jeon et al., 2014; Marquand et al., 2017; Mestres-Missé et  
2 al., 2012; Morris et al., 2016; Parkes et al., 2017; Tziortzi et al., 2014; Verstynen et al., 2012).

3 There is significant cross-individual spatial variability in the network organization of both the  
4 cortex (Braga and Buckner, 2017; Gordon et al., 2017b, 2017c; Harrison et al., 2015; Li et al., 2019;  
5 Wang et al., 2015) and the thalamus (Greene et al., 2020), such that features of functional brain  
6 organization are not present at the same location in all subjects. Consequently, group averaging  
7 neuroimaging approaches fail to identify spatially localized organizational features that can be  
8 observed in individuals (Bijsterbosch et al., 2018; Feilong et al., 2018; Gordon et al., 2017a;  
9 Harrison et al., 2020), and this issue is likely magnified in the striatum due to its small size. Thus,  
10 prior use of group-averaged data may have obscured important aspects of fronto-striatal  
11 organization present in individual humans.

12 Recent approaches for noninvasively describing the individual-specific organization of the brain  
13 using RSFC (termed precision functional mapping, or PFM), have delineated the large-scale  
14 network-level organization of the cerebral cortex (Braga et al., 2020; Braga and Buckner, 2017;  
15 Gordon et al., 2017c; Laumann et al., 2015) and thalamus (Greene et al., 2020) in individuals. We  
16 recently extended PFM to demonstrate the presence of subnetwork structures within classic large-  
17 scale networks that comprise strong, functionally differentiated connections between spatially  
18 specific cortical and subcortical regions (Gordon et al., 2020). The high spatial specificity of  
19 connections that can be identified using this subnetwork-PFM technique makes it ideal for  
20 characterizing precise, spatially-specific fronto-striatal connections.

21 Precise characterization of individual-specific human cortico-striatal organization would allow us  
22 to address fundamental questions in neuroscience, such as “is brain organization continuous, or  
23 discrete?” The rostral-caudal organization of fronto-striatal projections has been termed a  
24 “functional gradient” (Haber, 2003), in that it describes a progression along a single rostral-caudal  
25 axis. Group-averaged neuroimaging data have been used to present functional cortico-striatal  
26 gradients as a continuous transition along a primary organizational axis (Jarbo and Verstynen,

1 2015; Marquand et al., 2017; Mestres-Missé et al., 2012; O’Rawe et al., 2019; Raut et al., 2020;  
2 Vogelsang and D’Esposito, 2018). However, the conceptualization of a continuous gradient  
3 organization of the brain must also be reconciled with the long-held perspective that the cortex is  
4 organized into discrete, noncontinuous areas that are networked together (Amunts and Zilles, 2015;  
5 Brodmann, 1909; O’Leary et al., 2007; Sejnowski and Churchland, 1989). Within these areas,  
6 functional, connective, topographic, and architectonic properties are relatively constant, while  
7 borders between areas exhibit abrupt, discontinuous changes in these properties (Cohen et al.,  
8 2008; Felleman and Van Essen, 1991). The question of whether brain organization is better  
9 conceptualized as continuous gradients or discontinuous areas is a critical one, as conceptual  
10 models can strongly influence experimental and analytical approaches. For example, when studying  
11 a neuropsychiatric disorder such as schizophrenia, should the focus be on location, size, function,  
12 and connections of discrete cortical and striatal areas? Or are neuropsychiatric disorders better  
13 captured by alterations in the endpoints, direction, shape, and descent steepness of continuous  
14 cortical and striatal gradients?

15 Here, we precisely characterized fronto-striatal connections in individual humans. We identified  
16 subnetworks that describe cortico-striatal connections in ten individual human brains using >5 hours  
17 of RSFC data per-individual (Midnight Scan Club [MSC] dataset). We examined the degree to  
18 which the observed organization of cortico-striatal connections converged or differed from existing  
19 models of fronto-striatal connectivity based on non-human primate data (Haber, 2016). We then  
20 tested whether individual-specific fronto-striatal connections were best represented as a smooth,  
21 continuous progression, or whether they were best represented as discontinuous functional areas.

22

## 1 **RESULTS**

2

### 3 **Striatal Subnetworks are Individually Specific but Spatially Similar Across Subjects**

4 We delineated individual-specific subnetworks connecting striatum to cortex and matched them  
5 across subjects following procedures described in (Gordon et al., 2020). Briefly, in each subject we  
6 calculated RSFC strength between each pair of points in the brain, and then used a data-driven  
7 subnetwork detection procedure designed to identify and operate upon the strongest functional  
8 connections of every point in the brain. We then matched subnetworks with striatal and cortical  
9 representation across subjects. See Methods for details.

10 Ten separate subnetworks with striatal and cortical representation were identified that were  
11 spatially and topologically consistent across subjects, with some inter-individual variability in the  
12 localization of each subnetwork. See Fig 1 for an example subject; see Fig S1 for all subjects; see  
13 Fig 2 for the overlap of each subnetwork across subjects; and see Table S1 for information about  
14 the consistency of connections. These ten subnetworks existed as substructures within several  
15 known large-scale brain networks, including the Default-Mode, Salience, Cingulo-opercular, Fronto-  
16 parietal, Language, and Somatomotor networks (see Fig 3 for an example subject; see Table S1 for  
17 mode network memberships across subjects). The spatial representations of these subnetworks  
18 spanned from posterior putamen to nucleus accumbens in striatum, and from central sulcus and  
19 parietal/temporal lobes in cortex to subgenual cingulate/orbitofrontal cortex.

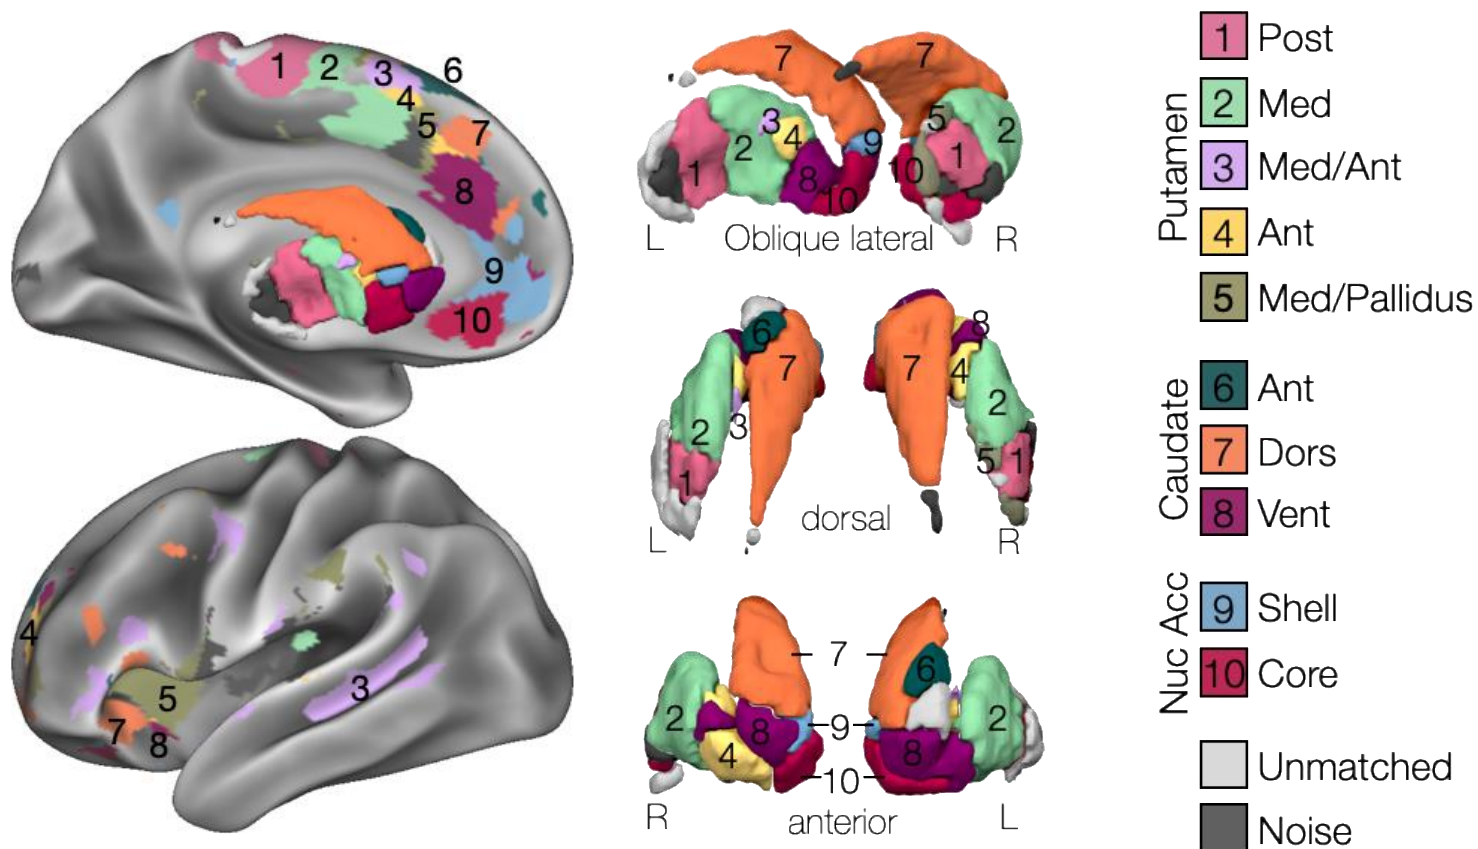

1  
 2 **Figure 1: Cortico-Striatal Subnetworks in an Exemplar Subject (MSC01).** Left: Subnetwork  
 3 representation in left hemisphere cortex and striatum. Right: Subnetwork representation in bilateral  
 4 striatum from dorsal (top), anterior (middle), and oblique lateral-posterior (bottom) views.  
 5  
 6



## Putamen

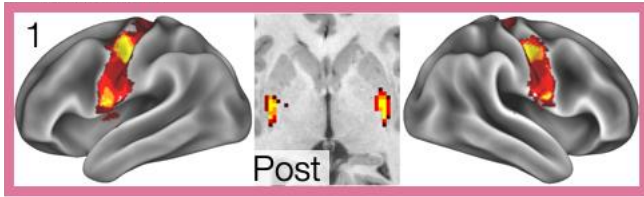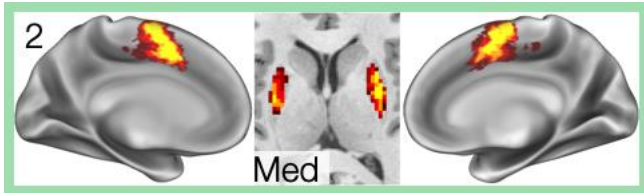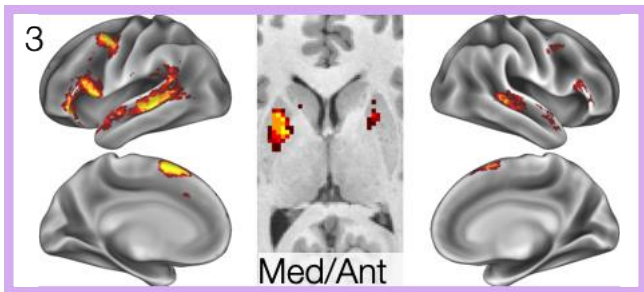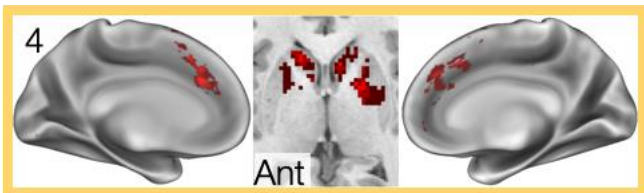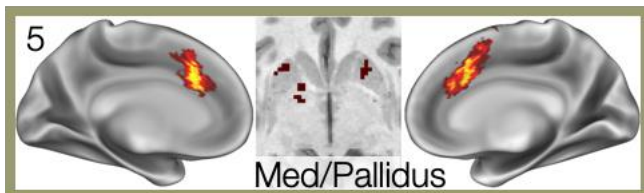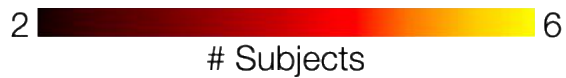

## Caudate

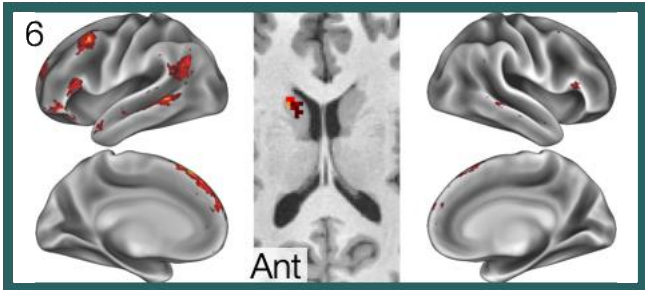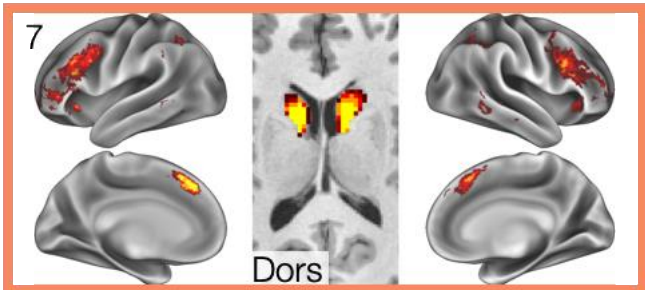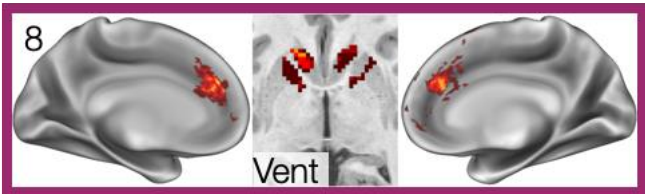

## Nuc. Accumbens

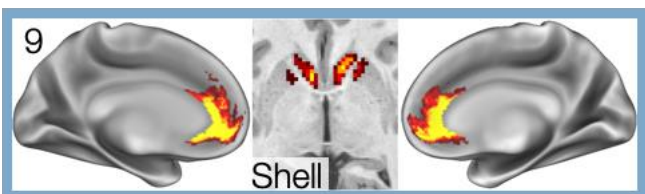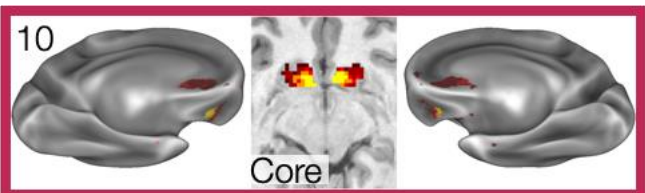

1  
2 **Figure 2: Striatal Subnetwork Overlap across Subjects.** Cross-subject overlap of matched  
3 striatal subnetworks. Heat map indicates number of subjects with spatial overlap of matched  
4 subnetworks at each point in the brain.  
5  
6

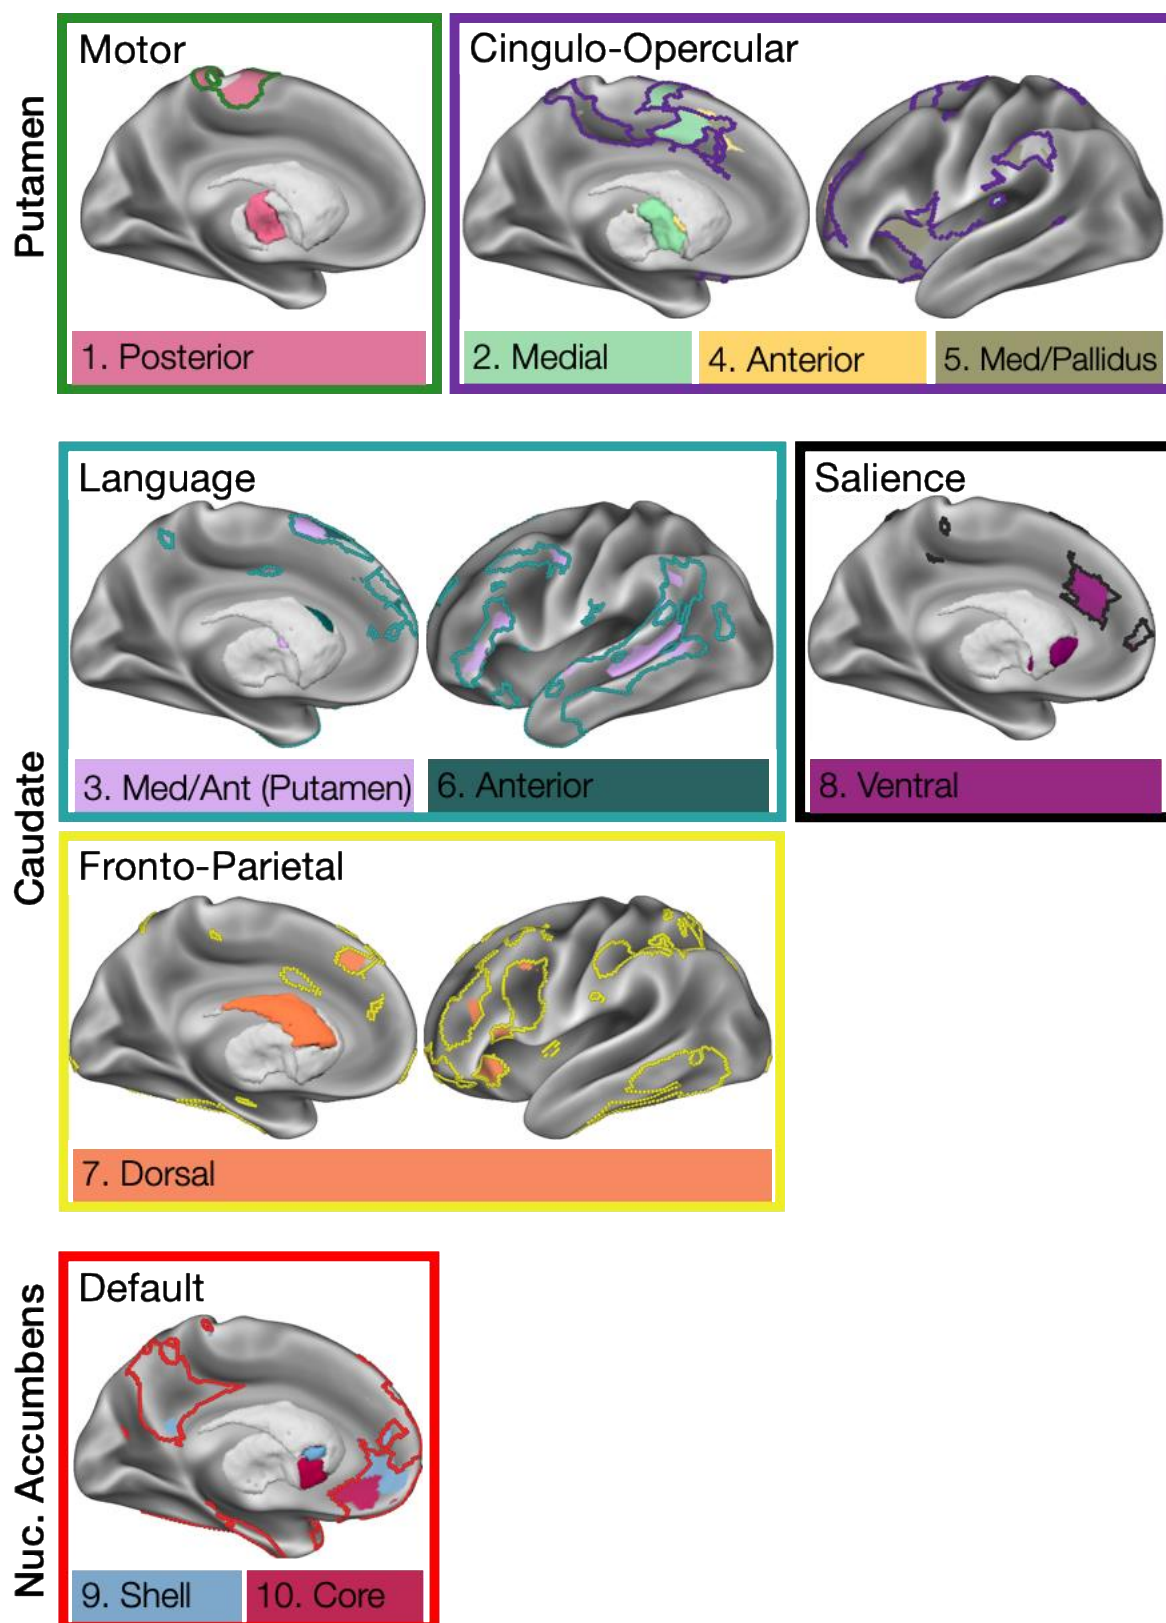

1  
2 **Figure 3: Striatal Subnetworks Are Substructures within Canonical Functional Networks.**  
3 Striatal subnetworks in an exemplar subject (MSC01) are contained within known large-scale  
4 cortical networks (colored borders).

1 Across subjects, an average of 95% (range: 91% to 99%) of striatal voxels were matched to one  
2 of the ten subnetworks. Thus, the subnetworks described here represent the large majority of  
3 strong functional cortico-striatal connections, with very little of the striatum containing idiosyncratic  
4 subnetwork connections that cannot be compared across subjects.

5 These subnetworks showed significant overlap with the non-human primate-based model of  
6 cortico-striatal connections advanced by (Haber, 2016) (Fig 4). First, these subnetworks, which  
7 represent very strong cortico-striatal functional connections, most commonly connected striatum to  
8 frontal cortex. In each subject, we calculated the percent of cortical vertices with any subnetwork  
9 representation that were within each cortical lobe (Fig S2A). Across subjects, we found that  $70\% \pm$   
10  $6\%$  (mean  $\pm$  SD) of these subnetworks' cortical vertices were within frontal lobe, which was higher  
11 in every subject than in the insula ( $10\% \pm 2\%$ ), parietal lobe ( $9\% \pm 3\%$ ), temporal lobe ( $10\% \pm 6\%$ ),  
12 or occipital lobe ( $1\% \pm 1\%$ ); all paired  $t_s(9) > 17.0$ , all  $p_s < 10^{-7}$ , indicating that subnetwork  
13 connections were most commonly to frontal lobe. Similarly, we evaluated the strength of within-  
14 subnetwork cortico-striatal RSFC for each lobe in each subject (Fig S2B). Across subjects, within-  
15 subnetwork RSFC between striatal and frontal regions was  $0.25 \pm .02$  (mean  $\pm$  SD), which was  
16 higher in every subject than RSFC between striatum and insula ( $0.15 \pm 0.03$ ), parietal lobe ( $0.11 \pm$   
17  $0.04$ ), temporal lobe ( $0.10 \pm 0.02$ ), or occipital lobe ( $0.12 \pm 0.06$ ); all paired  $t_s(9) > 6.8$ , all  $p_s <$   
18  $0.0002$ , indicating that the few non-frontal subnetwork connections that were identified were weaker  
19 than frontal connections.

20 Second, the spatial distributions of these subnetworks in large parts converged with the Haber  
21 (2016) model (Fig 4), with several important exceptions (see below). Projections to posterior and  
22 middle putamen originated in motor and premotor cortex, respectively; projections to dorsal caudate  
23 originated from dorsomedial and dorsolateral prefrontal cortex; and projections to ventral anterior  
24 caudate and medial putamen originated from the dorsal anterior cingulate cortex. Projections to  
25 nucleus accumbens originated from medial and orbitofrontal cortex; though notably, the targets of

1 the medial and orbitofrontal cortex projections within nucleus accumbens (to the shell and core,  
2 respectively) appeared reversed relative to the non-human primate model.

3 Importantly, we discovered two subnetworks missing from the non-human primate-derived  
4 model of cortico-striatal connections advanced by (Haber, 2016) (Fig 4): 1) a subnetwork (Figs 1-3,  
5 #3, Med Ant Putamen, pink) with representation primarily in medial putamen and sometimes lateral  
6 caudate head, as well as in a distributed set of cortical regions including dorsomedial prefrontal  
7 cortex, inferior frontal gyrus, posterior middle frontal gyrus, and superior temporal sulcus; and 2) a  
8 subnetwork (Figs 1-3, #6, Ant Caudate, dark green) with representation in anterior lateral caudate  
9 and distributed cortical regions immediately adjacent to the medial putamen subnetwork. See Fig  
10 S3A for these subnetworks in all subjects. Notably, the cortical distributions of these subnetworks—  
11 especially the medial putamen subnetwork—converge with the known distribution of the human  
12 language network (Braga et al., 2020).

13 Like the human language network, these two subnetworks were left-lateralized, with more  
14 extensive left than right hemisphere representation in both cortical and subcortical structures. To  
15 quantify this observation, for each subnetwork we calculated a laterality index as  $([\# \text{ left hemisphere}$   
16  $\text{ vertices/voxels}] - [\# \text{ right hemisphere vertices/voxels}]) / [\# \text{ total vertices/voxels}]$ , separately in cortex  
17 and in striatum. With this index, positive values indicate left lateralization, while negative values  
18 indicate right lateralization. We found that, in every subject, these two subnetworks were left-  
19 lateralized in both cortex and striatum (medial putamen subnetwork: cortex mean laterality= $.62 \pm .24$ ,  
20 one-sample  $t(9)=7.9$ ,  $p < 10^{-4}$ ; striatum mean laterality= $.73 \pm .32$ ,  $t(9)=7.2$ ,  $p < 10^{-4}$ ; lateral caudate  
21 subnetwork: cortex mean laterality= $.67 \pm .34$ , one-sample  $t(9)=5.7$ ,  $p < 0.001$ ; striatum mean  
22 laterality= $.72 \pm .36$ ,  $t(9)=5.4$ ,  $p < 0.002$ ); see Fig S3B. By contrast, no other subnetwork exhibited  
23 consistent lateralization across subjects (all  $t_s(9) < 2.2$ , all  $p_s > 0.05$  in both cortex and striatum).

24



## A Model: Fronto-Striatal Connectivity (Non-human Primates)

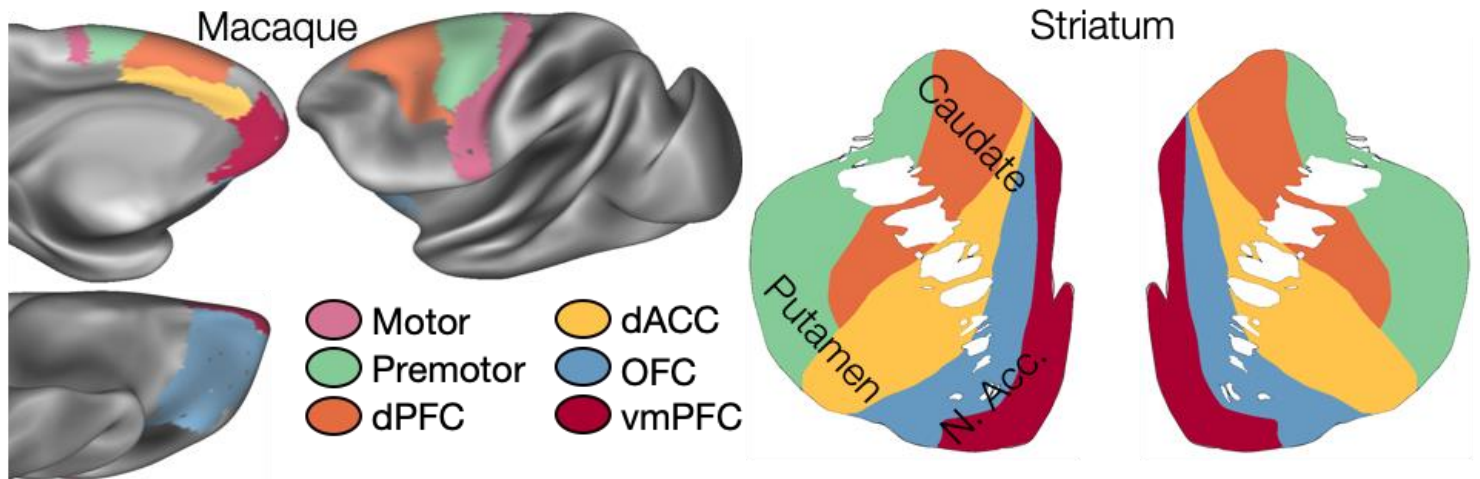

## B Data: Fronto-Striatal Subnetwork Connectivity (Human)

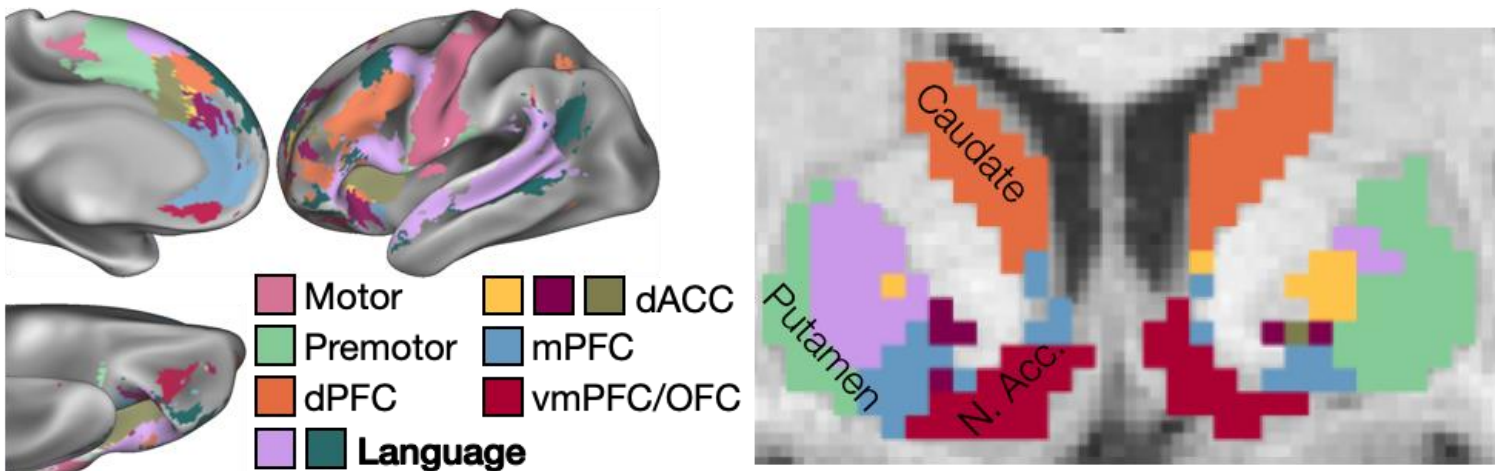

1  
 2 **Figure 4: Non-Human Primate Model and Actual Organization of Human Cortico-Striatal**  
 3 **Connectivity.** A) Prior organizational model of fronto-striatal connections in cortex (left) and  
 4 striatum (right), based primarily on tract-tracing work in non-human primates, proposed by Haber,  
 5 2016. Images are adapted from Haber, 2016, with anatomical locations displayed on a macaque  
 6 cortex. B) Organization of cortico-striatal connections observed in the present work. Cortical  
 7 vertices/voxels are colored based on the most common subnetwork present across the ten  
 8 subjects. A putative Language network (bolded in the inset legend) was not identified in the Haber  
 9 model. Note that a Motor subnetwork is present posterior of the displayed slice in putamen, and a  
 10 second Language network is present anterior of the displayed slice in left caudate.

11

12

13 **Fronto-Striatal Organization is Better Explained as a Stepped than a Continuous Gradient**

1       Fronto-striatal connectivity is often presented as exhibiting a smooth and continuous rostral-  
2       caudal gradient (e.g., model in Fig 5A, left). Visual examination of the subnetworks identified here  
3       (see Fig 1) does support the presence of a rostral-caudal gradient; however, it also suggests that  
4       this gradient may be not smooth, but comprised of a progression of discontinuous cortical areas  
5       with discrete connectivity profiles (model in Fig 5A, right). Such a gradient may be conceptualized  
6       as “stepped” rather than smooth and continuous. A stepped gradient would be consistent with both  
7       the postulated rostral-caudal gradient of fronto-striatal projections (Vogelsang and D’Esposito,  
8       2018) as well as with the areal model of cortex (Brodmann, 1909; Churchland and Sejnowski,  
9       1988). As a third possibility, both the continuous and stepped models could simultaneously be  
10      present, such that regions exhibit categorically distinct fronto-striatal connections from each other,  
11      but a rostral-caudal gradient also exists overlaid on top of the discrete regions. Here, we used linear  
12      regression models to test whether the locations of strong fronto-striatal connections were best  
13      explained by continuous rostral-caudal position, or by discrete subnetwork identities, or by both.

14      We first had to define the rostral-caudal position for each brain location of interest. We defined a  
15      separate rostral-caudal axis for the caudate, the left and right putamen, and the prefrontal cortex  
16      (Fig 5B), each with its own unique geometry. We then labeled each striatal voxel and each frontal  
17      cortex vertex according to its position along that fit line (i.e., the point along the structure-specific fit  
18      line that is closest to that voxel / vertex). The calculated rostral-caudal position of each voxel /  
19      vertex can be seen in Fig 5C. Note that we elected to use this anatomically-based rostral-caudal  
20      orientation rather than explicitly fitting a gradient to the RSFC data because we did not want the  
21      continuous gradient overfit to the data when comparing against a discrete organizational model.

## A Models of Fronto-Striatal Organization

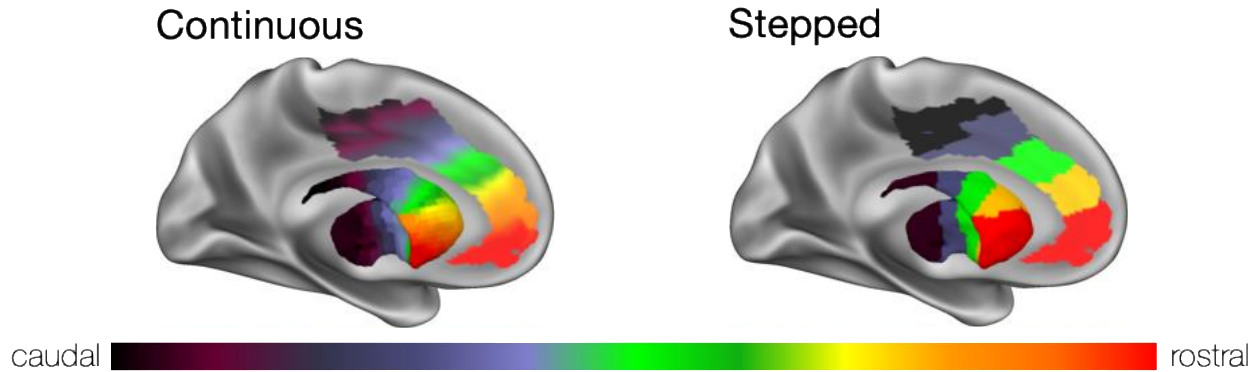

## B Structure-Specific Caudal-Rostral Fit Lines (MSC01)

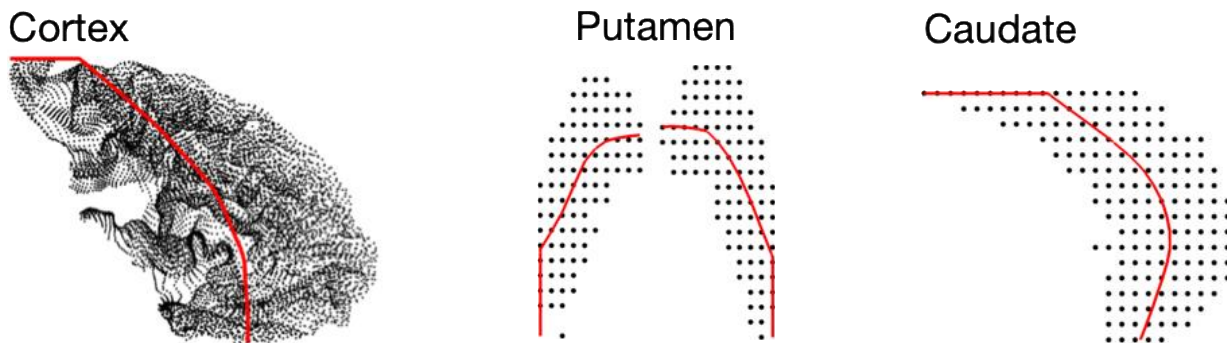

## C Position along Rostral-Caudal Fit Lines (MSC01)

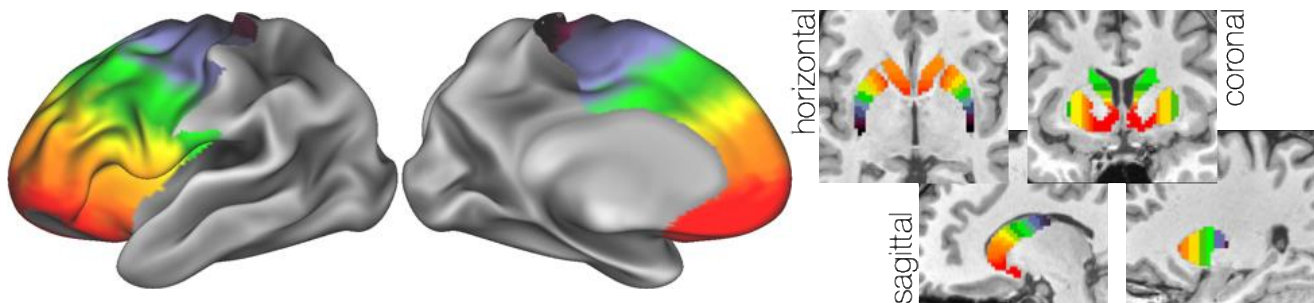

1  
2 **Figure 5: Modeling Fronto-Striatal Gradient Organization: Continuous vs Stepped.** A)  
3 Conceptually, fronto-striatal connections may be organized as a continuous (left) or a stepped  
4 (right) mirrored rostral-caudal gradient. B) Rostral-caudal orientation fit lines are shown for example  
5 subject MSC01 within frontal cortex plus anterior insula (left), left and right putamen (middle), and  
6 caudate (right). C) Position along the rostral-caudal fit lines is shown for example subject MSC01  
7 for all points within frontal cortex plus anterior insula (left) and striatum (right). These rostral-caudal  
8 positions were used to compare models of organization described in (A). Note that while striatal  
9 connections with non-frontal sources were observed (Figs 1-3, Fig S2), rostral-caudal modeling  
10 here is restricted to the frontal cortex.  
11

1 We then conducted two separate, symmetric series of regressions in every subject. First, for  
2 every frontal/insular cortical vertex with a subnetwork identity, we calculated the voxel within the  
3 striatum that had the strongest functional connectivity with that vertex. As stronger functional  
4 connectivity is arguably likely to represent more direct connections, we take this voxel of maximal  
5 connectivity to be the striatal target of that cortical vertex.

6 To test the continuous gradient hypothesis, which holds that the rostral-caudal positions of  
7 connected cortical and subcortical regions should vary continuously with each other, we regressed  
8 the rostral-caudal position of the cortical source vertex against the continuous rostral-caudal  
9 position of the striatal target voxel. To test the discrete, stepped gradient hypotheses, we conducted  
10 a one-way ANOVA examining whether the rostral-caudal position of the striatal target voxel was  
11 explained by the subnetwork identity of the cortical source vertex. In each case, the adjusted  $R^2$   
12 value was calculated as the measure of variance explained, in order to allow direct comparisons  
13 between these two regressions which had differing numbers of independent variables. It is  
14 important to note that the dependent variable in both of these regressions was the rostral-caudal  
15 position of the subcortical target voxel. As a result, the adjusted  $R^2$  values are directly comparable  
16 between the two; and further, this rostral-caudal position is not a priori known from either the  
17 cortical vertex's position or its subnetwork identity. Finally, to test whether both the continuous and  
18 discrete models might be simultaneously true, we entered both the cortical position and subnetwork  
19 identity into an ANCOVA model testing against subcortical voxel position.

20 We found that both the continuous and the discrete, stepped gradient hypotheses successfully  
21 fit the data, but that the discrete stepped hypothesis explained more variance in the data (Fig 6,  
22 A,C,E). Across subjects, a cortical vertex's rostral-caudal position explained  $17\% \pm 16\%$  (mean  $\pm$   
23 SD) of the variance in the rostral-caudal position of its connected striatal voxel (see Fig 6A for an  
24 example subject; Fig 6E, top for all subjects). By contrast, the vertex's subnetwork identity  
25 explained  $56\% \pm 13\%$  of the variance in the rostral-caudal position of its connected striatal voxel



1 (see Fig 6C for an example subject; Fig 6E, top for all subjects). Subnetwork identity explained  
2 more variance than rostral-caudal position in every subject.

3 When both factors were entered into the same ANCOVA model, only the discrete stepped  
4 gradient hypothesis explained unique variance in the data (Fig 6E, bottom). Across subjects, the  
5 rostral-caudal position of a cortical vertex explained only  $0.6\% \pm 0.8\%$  of unique variance in the  
6 position of its striatal target, after controlling for subnetwork identity. By contrast, the subnetwork  
7 identity of the cortical vertex still explained  $40\% \pm 7.5\%$  of unique variance in the position of its  
8 striatal target, after controlling for rostral-caudal position.

9 The above regressions were asymmetric: they explained the rostral-caudal position of a  
10 subcortical target based on the position and/or subnetwork identity of its cortical source. To ensure  
11 symmetry of these effects, we repeated all of the regressions in the reverse direction, in which the  
12 most strongly connected cortical source vertex was calculated for each striatal voxel, and the  
13 rostral-caudal position of a cortical source vertex was explained based on the position and/or  
14 subnetwork identity of the striatal voxel.

15 In these regressions, once again both the continuous and the discrete, stepped gradient  
16 hypotheses successfully fit the data, but the discrete stepped hypothesis explained more variance  
17 in the data (Fig 6, B,D,F): a subcortical voxel's rostral-caudal position explained  $25\% \pm 17\%$  (mean  
18  $\pm$  SD) of variance in the rostral-caudal position of its connected cortical vertex (see Fig 6B for an  
19 example subject; Fig 6F, top for all subjects), but the voxel's subnetwork identity explained  $45\% \pm$   
20  $16\%$  of variance (Fig 6D for an example subject; Fig 6F, top for all subjects), with subnetwork  
21 identity explaining more variance than rostral-caudal position in 9/10 subjects.

22 When both factors were entered into one model, again only the discrete stepped gradient  
23 hypothesis explained unique variance in the data (Fig 6F, bottom), with the rostral-caudal position  
24 of a subcortical voxel explaining only  $3\% \pm 4\%$  of unique variance after controlling for subnetwork  
25 identity, and the subnetwork identity of the voxel still explaining  $22\% \pm 12\%$  of unique variance.

- 1 These findings indicate that the rostral-caudal progression of strong fronto-striatal connections is
- 2 organized as a stepped gradient composed of a series of discrete subnetworks.
- 3

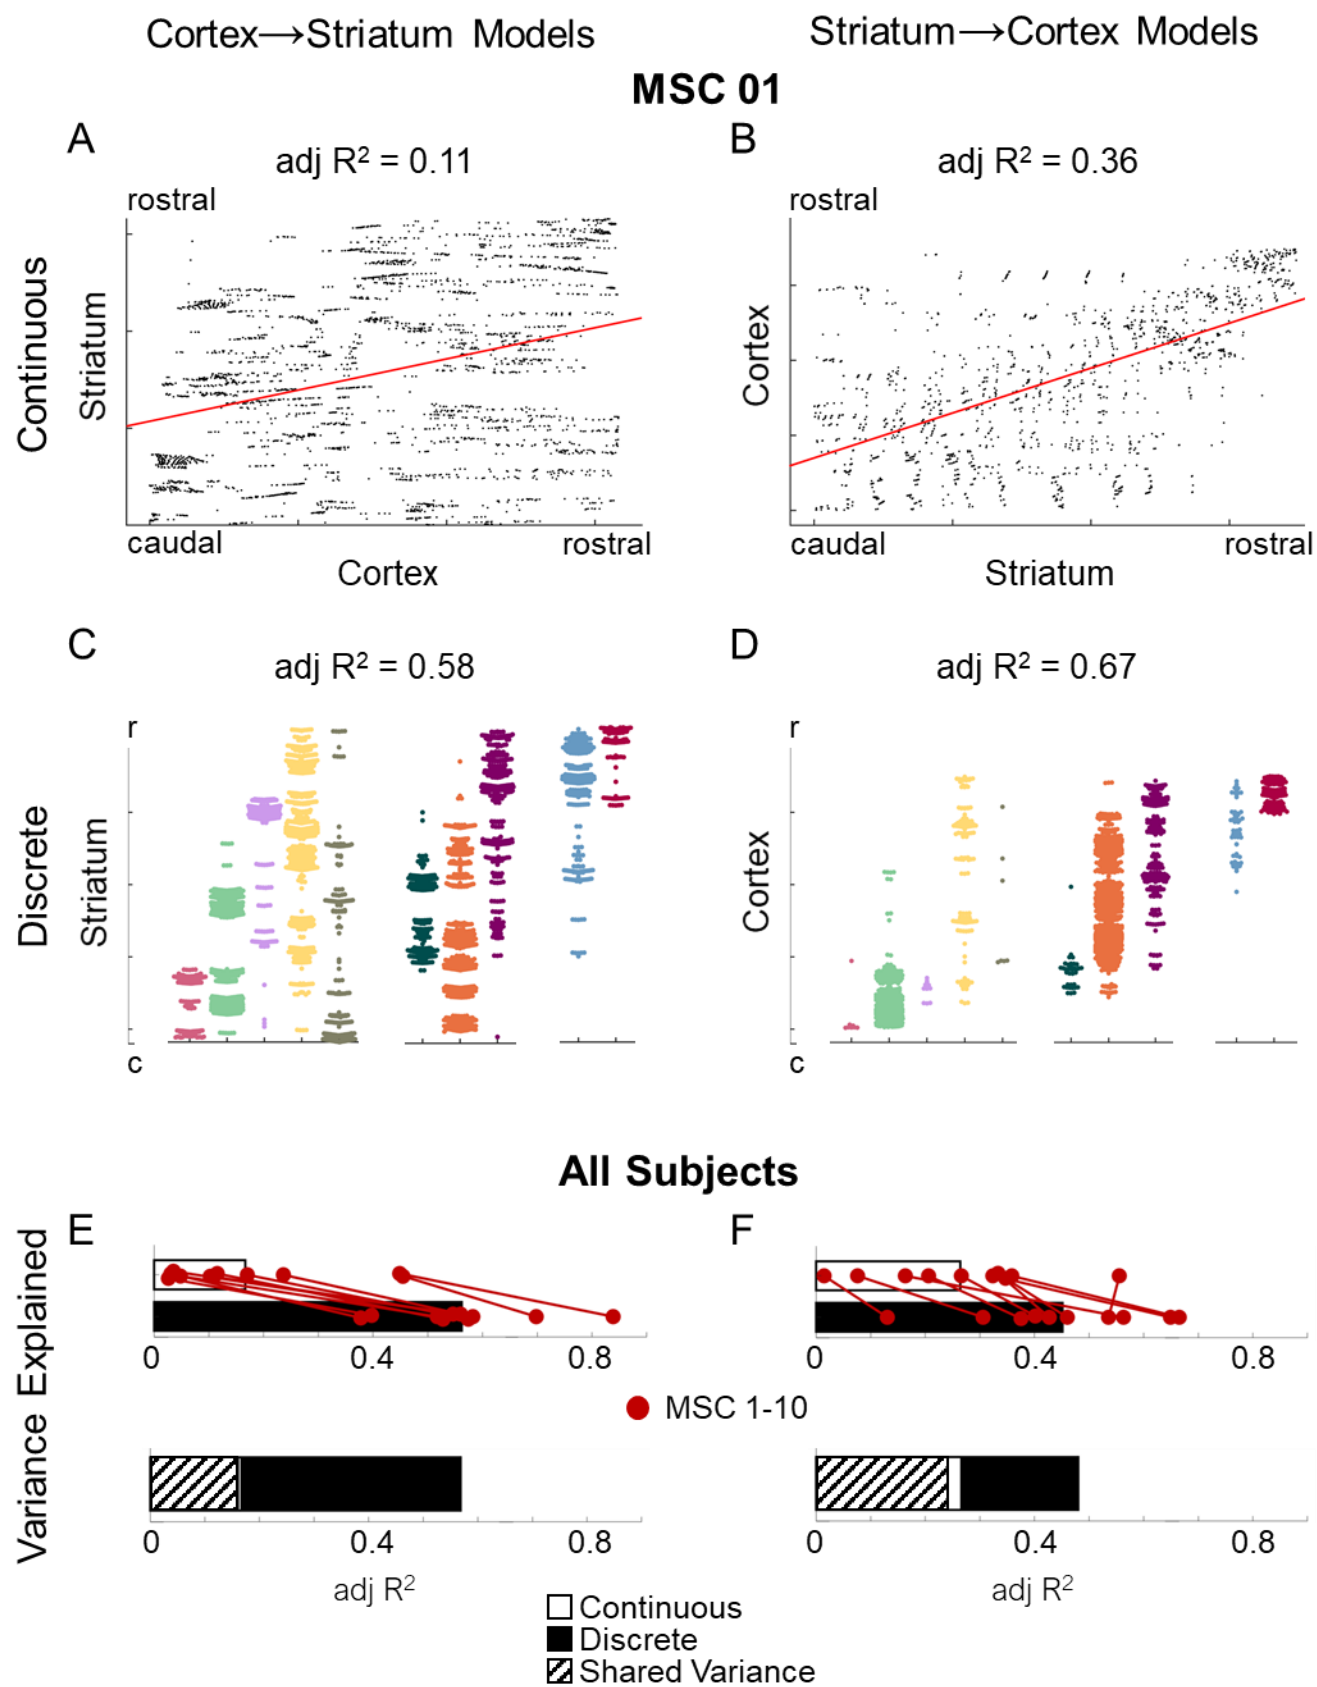

1  
2 **Figure 6: Stepped Gradients Composed of Subnetworks Explain more Variance in Fronto-**  
3 **Striatal Organization than Continuous Gradients.** In example subject MSC01, A) the continuous  
4 rostral-caudal position of a cortical vertex (x-axis) explained variance in the rostral-caudal position  
5 of its most strongly connected striatal target (y-axis), and vice versa (B). However, the discrete  
6 subnetwork identity of a cortical vertex (delineated by color and by x-axis position) explained more  
7 variance in the rostral-caudal position of its striatal target (y-axis), and vice versa (D). In A-D, each  
8 dot represents one cortical vertex (A,C) or striatal voxel (B,D). Across subjects, for both the  
9 cortex→striatum regressions (E) and the striatum→cortex regressions (F), both continuous rostral-  
10 caudal position and discrete subnetwork identity explained substantial variance, but subnetwork  
11 identity explained more variance in every subject (top). When both factors were employed in the  
12 same model (bottom), the discrete subnetwork identity still explained substantial unique variance,  
13 but the continuous gradient factor explained almost no unique variance.  
14

15  
16 The progression of subnetworks along the rostral-caudal axis is more striking on the medial  
17 surface of the frontal cortex than on the lateral surface (e.g. Fig 1). It is possible that the relative  
18 explanatory power of continuous vs stepped gradients might vary based on whether projections are  
19 from the medial or lateral surface. To explore this possibility, we repeated the regressions above  
20 twice: once while restricting cortical source vertices to only the medial, and then to the lateral,  
21 frontal cortical surfaces. We found that on the medial surface, adjusted  $R^2$  values were much higher  
22 for both the continuous (cortex→striatum: 33% ± 17%; striatum→cortex: 41% ± 12%) and the  
23 stepped (cortex→striatum: 61% ± 13%; striatum→cortex: 66% ± 12%) gradient models, but the  
24 stepped model explained more variance than the continuous model in every subject, in both  
25 directions. On the lateral surface, adjusted  $R^2$  values for the continuous gradient (cortex→striatum:  
26 18% ± 24%; striatum→cortex: 24% ± 14%) were similar to those observed across the whole frontal  
27 cortex, but adjusted  $R^2$  values for the stepped gradient were slightly lower (cortex→striatum: 50% ±  
28 13%; striatum→cortex: 38% ± 14%); however, the stepped model explained more variance than the  
29 continuous model in every subject in the striatum→cortex direction, and in 9/10 subjects in the  
30 cortex→striatum direction. These results suggest that the rostral-caudal organization of fronto-  
31 striatal connections, which is organized as a stepped gradient, is more prominent in the medial than  
32 the lateral frontal cortex.  
33

## 1 **DISCUSSION**

2 In this work, we identified ten subnetworks representing very strong, anatomically precise,  
3 individually-specific connections between cortex and striatum that could be matched across  
4 subjects. The identification of these connections within individual humans represents a substantial  
5 breakthrough in our ability to understand these circuits that are both critical for complex behaviors  
6 and implicated in many neuropsychiatric disorders. The neurobiological validity of the observed  
7 cortico-striatal subnetwork structures is supported by their general convergence with findings from  
8 invasive, anatomically precise tract-tracing studies in non-human primates. Critically, the identified  
9 subnetworks also diverge from non-human primate-based models of fronto-striatal connectivity in  
10 several ways, most prominently by identifying left-lateralized striatal elements of the human  
11 language network.

12

### 13 **Most Cortico-striatal Subnetworks Converge with Primate Tract-tracing**

14 We identified striatal subnetworks composed of only very strong functional connections in single  
15 individuals, and we found that 1) the majority of these very strong cortico-striatal connections were  
16 from frontal cortex, and 2) frontal regions of these subnetworks had stronger connectivity with  
17 striatum than non-frontal regions, suggesting that the non-frontal regions we did observe were less  
18 strongly associated with striatal activity. This converges with non-human primate work arguing that,  
19 while striatum does receive inputs from diverse cortical sources across frontal, parietal, insular, and  
20 temporal cortex (Cavada and Goldman-Rakic, 1991; Cheng et al., 1997; Chikama et al., 1997;  
21 Selemon and Goldman-Rakic, 1988, 1985; Steele and Weller, 1993; Van Hoesen et al., 1981;  
22 Webster et al., 1993; Yeterian and Pandya, 1998, 1993; Yeterian and Van Hoesen, 1978), the  
23 strongest, most driving projections to striatum are argued to arise from frontal lobe (Haber, 2003).  
24 Thus, the present subnetwork connections represent a substantial increase in specificity over prior  
25 human neuroimaging work that identified cortico-striatal connections originating from large swaths

1 of cortex and from distributed networks across multiple cortical lobes (Choi et al., 2012; Greene et  
2 al., 2014; Morris et al., 2016; Parkes et al., 2017; Tziortzi et al., 2014).

3 The identified fronto-striatal circuits were highly ordered as a topographically mirrored rostral-  
4 caudal gradient of cortico-striatal projections. This organization converged with the organization of  
5 these circuits proposed based on findings from non-human primates (Haber, 2016, 2003); see Fig  
6 4. Specifically, moving from caudal to rostral striatum:

7 1) We found functional connections between somatomotor regions in the central sulcus and the  
8 posterior putamen (Fig 4, magenta), consistent with previous observations of projections from  
9 precentral motor cortex to posterior putamen in humans (Zeharia et al., 2015) and non-human  
10 primates (Flaherty and Graybiel, 1994; Künzle, 1975). These connections are likely related to  
11 striatal control over motor function.

12 2) We found functional connections between regions just anterior to the somatomotor strip,  
13 particularly in dorsomedial prefrontal cortex, and the middle lateral putamen (Fig 4, green),  
14 consistent with previous observations in non-human primates of projections from pre-  
15 /supplementary motor cortex to middle lateral putamen (Haber, 2003; Künzle, 1978). These circuits  
16 are engaged during performance of complex (non-automatized) motor skills (Boecker et al., 1998).

17 3) We found functional connections between dorsomedial and dorsolateral prefrontal cortex,  
18 within the fronto-parietal network, and a large extent of dorsal caudate (Fig 4, orange). This  
19 observation is consistent with previous accounts of projections from dorsolateral prefrontal cortex to  
20 terminals in dorsal caudate that span a significant rostral-caudal extent (Arikuni and Kubota, 1986;  
21 Haber et al., 2006; Selemon and Goldman-Rakic, 1985), which have been argued to play a critical  
22 role in working memory (Partiot et al., 1996).

23 4) We found several sets of functional connections between dorsal anterior cingulate cortex /  
24 anterior insula and the anterior caudate/putamen (Fig 4, yellow / maroon / brown). These  
25 observations align with those from previous investigations of projections from primate dorsal  
26 anterior cingulate to anterior caudate and putamen, and particularly to sites more dorsal and lateral

1 than the orbitofrontal cortex (OFC) or ventromedial prefrontal cortex (vmPFC) projections described  
2 below (Haber et al., 2006). This set of cortical regions (dorsal anterior cingulate, anterior insula,  
3 anterior striatum) is considered the core of the adjacent “Cingulo-opercular” and “Salience”  
4 networks, which are critical for a wide variety of cognitive control operations

5 5) We found functional connections between nucleus accumbens and pregenual medial  
6 prefrontal cortex (mPFC), and a separate set with OFC / subgenual cingulate cortex (Fig 4, blue /  
7 red). These connections match circuitry known to be critical for reward processing / addiction  
8 (Haber and Knutson, 2010; Koob and Volkow, 2016) and mood disorders (Drevets et al., 2008),  
9 respectively. The nucleus accumbens is anatomically segregated into a more dorsal shell and a  
10 more ventral core (Salgado and Kaplitt, 2015). Here, the nucleus accumbens nodes of these two  
11 subnetworks exhibited a similar dorsal/ventral distribution; as such, we tentatively label these nodes  
12 the accumbens shell and core, respectively.

13 Interestingly, these connections only partially converged with connectivity identified in non-  
14 human primates, in which the nucleus accumbens core preferentially receives projections from  
15 pregenual mPFC, while the shell receives projections from OFC—the reverse of the arrangement  
16 we observed here. It is possible that this divergence from non-human primate work is driven by  
17 fMRI data quality issues, such as the known presence of susceptibility artifact within ventral  
18 prefrontal and orbitofrontal cortex in human fMRI. However, human diffusion tractography imaging  
19 has also demonstrated that the accumbens core is more strongly connected to OFC than the shell  
20 (Baliki et al., 2013; Cartmell et al., 2019; Xia et al., 2017), convergent with our present findings. We  
21 consider an alternate possibility that this divergence represents a true organizational difference  
22 between humans and non-human primates related to reward processing.

23 Several of the connections identified here, including to the posterior and middle putamen, dorsal  
24 caudate, and nucleus accumbens core, were restricted to a single target subcortical structure. This  
25 represents an increase in target specificity relative to the (Haber, 2016) model, in which similar  
26 fronto-striatal projections span the internal capsule (Fig 4A,B, green and orange) or extend out of

1 nucleus accumbens into caudate (Fig 4A,B, red). We consider it most likely that frontal projections  
2 to multiple striatal structures do exist in humans, but that projections to secondary structures do not  
3 drive striatal function as strongly as projections to the primary target structure.

#### 4 5 **Two Cortico-Striatal Subnetworks Diverged from Primate Models but Converged with Human** 6 **Language Networks**

7 We observed two subnetworks that did not converge with proposed models of non-human  
8 primate fronto-striatal connectivity (Haber, 2016). These consisted of two adjacent sets of  
9 distributed fronto-temporal regions connected to anterior medial putamen and anterior lateral  
10 caudate (Fig 4B, pink / dark green). Based on several lines of evidence, we argue that these  
11 connections represent circuitry for language processing. First, the cortical elements of these  
12 connections are highly convergent with previous descriptions of Language networks in group-  
13 average (Friederici and Gierhan, 2013; Ji et al., 2019) and individual (Braga et al., 2020) human  
14 neuroimaging data. Second, as with human language function (Corballis, 2012; Friederici, 2011;  
15 Ocklenburg et al., 2014), connections of these two subnetworks were consistently lateralized, with  
16 greater extent in the left hemisphere than in the right hemisphere in both cortex and striatum. No  
17 other cortico-striatal network structure exhibited consistent lateralization across subjects. Third, the  
18 striatal elements of these connections converge well with previous work reporting activation in  
19 anterior medial putamen (Friederici et al., 2003) and anterior lateral caudate (Mestres-Missé et al.,  
20 2012) in response to specifically effortful, non-automatic language processing. These findings  
21 suggest that the striatal elements of these language subnetworks may be critical for learning and  
22 executing new language-related tasks, similar to the learning and optimization role ascribed to the  
23 striatum in other behavioral domains (Cohen and Frank, 2009).

24 Some connections of this human cortico-striatal language network do exist in non-human  
25 primates. Lateral prefrontal cortex and superior temporal sulcus have been shown to project to each  
26 other (Yeterian et al., 2012), and superior temporal cortex projects to lateral caudate and medial



1 putamen (Selemon and Goldman-Rakic, 1985; Yeterian and Pandya, 1998). However, the multiple  
2 elements of the language network (inferior frontal gyrus, posterior middle frontal gyrus, medial  
3 superior frontal gyrus, superior temporal sulcus, and striatum) are not known to be all  
4 interconnected in non-human primates, as we demonstrate here in humans. This supports the idea  
5 that the human language network is an evolutionarily novel network scaffolded in part upon existing  
6 circuitry present in pre-human primates (Dick and Tremblay, 2012; Friederici, 2017).

7

### 8 **Fronto-striatal Connections Are Organized as a Stepped, not Continuous, Gradient**

9 Prior work has demonstrated that fronto-striatal connections are organized as mirrored cortical  
10 and striatal gradients spanning from primary motor cortex / posterior putamen to nucleus  
11 accumbens / ventromedial prefrontal cortex. This finding is consistent across humans and non-  
12 human primates, and across methodologies ranging from invasive tract-tracing to diffusion MRI to  
13 RSFC to task-based fMRI (Haber, 2003; Jarbo and Verstynen, 2015; Marquand et al., 2017;  
14 Mestres-Missé et al., 2012; O’Rawe et al., 2019; Raut et al., 2020; Steiner and Tseng, 2010;  
15 Vogelsang and D’Esposito, 2018), and similar mirrored gradients have even been observed in mice  
16 (Peters et al., 2021). Interestingly, the rostral-caudal orientation of these fronto-striatal gradients  
17 closely match—and likely exist within—a proposed whole-brain organizational framework in which  
18 multiple mirrored gradients span from unimodal to transmodal regions (Huntenburg et al., 2018;  
19 Margulies et al., 2016; Raut et al., 2020; Zhang et al., 2019).

20 Fronto-striatal gradients are often presented, for visual or mathematical convenience, as if they  
21 were smooth and continuous. However, the concept of a smooth, continuous fronto-striatal gradient  
22 conflicts with evidence that the brain is organized as discrete, discontinuous areas networked  
23 together (Amunts and Zilles, 2015; Brodmann, 1909; Churchland and Sejnowski, 1988; Felleman  
24 and Van Essen, 1991; Glasser et al., 2016a; Sejnowski and Churchland, 1989). These areas are  
25 established early in the brain’s development, when multiple continuous, overlapping gradients of  
26 morphogens and signaling molecules, combined with differential thalamic inputs, induce a process

1 of discrete arealization (O’Leary et al., 2007). While continuous topographic gradients can be  
2 present within a given area (e.g. the visuotopic organization of primary visual cortex), these small-  
3 scale gradients are discontinuous (and sometimes even reversed) at areal boundaries (Baumann et  
4 al., 2013; Felleman and Van Essen, 1991; Leaver and Rauschecker, 2016; Sereno et al., 1995).

5 Importantly, a progressive rostral-to-caudal series of such discontinuous cortical areas with  
6 topographically ordered striatal projections—a stepped gradient—can visually (Fig 5A) and  
7 statistically (Fig 6A,B) appear continuous, particularly if the categorical divisions are unknown.  
8 Here, direct comparison of continuous gradient models against discontinuous, stepped gradient  
9 models demonstrated that the stepped gradient models explained the data much better (Fig 6). This  
10 indicates that there is little evidence for a smooth, continuous cross-areal gradient, either as a  
11 primary model of human fronto-striatal organization or as a secondary effect superimposed on top  
12 of a stepped gradient. Instead, the data is best explained as a stepped rostral-caudal gradient  
13 composed of a progressive series of discrete fronto-striatal subnetworks. Interestingly, the  
14 explanatory power of the stepped gradient model was particularly strong for connections originating  
15 from medial frontal cortex, where it explained almost 2/3rds of the variance in the connection’s  
16 location. This suggests that medial frontal projections are more strictly ordered than lateral frontal  
17 projections—an intriguing functional dissociation that should be examined in future work.

18 These results do not invalidate previous findings of a rostral-caudal organization of human  
19 fronto-striatal circuitry; rather, they modify the interpretation and implications of those findings. For  
20 example, findings that the rostral-caudal organization is related to separable types of goal-directed  
21 behaviors (Marquand et al., 2017), and that it represents a hierarchy of information processing,  
22 such that more rostral fronto-striatal regions process progressively more complex or abstract  
23 information (Choi et al., 2018; Jeon et al., 2014; Nee and Brown, 2013), are consistent with the  
24 present observations. However, these prior findings should be interpreted in the context of discrete  
25 networked structures that enable those different behaviors and levels of processing, rather than as  
26 a continuous gradient. It is possible that the large-scale unimodal-transmodal gradients previously

1 identified across the cortex and subcortex (Huntenburg et al., 2018; Margulies et al., 2016; O’Rawe  
2 et al., 2019; Raut et al., 2020; Zhang et al., 2019) may also be best conceptualized as stepped  
3 rather than continuous gradients, composed of a series of mirrored network and subnetwork  
4 connections.

5 The present approach for comparing continuous and stepped gradient models does have  
6 limitations. First, the infomap technique, while excellent at recovering true networked connections,  
7 is not always stable in determining when subnetworks should be combined or split. As a result, the  
8 categorical factor entered into the regression model may sometimes have too many or too few  
9 categories. Second, using the rostral-caudal location of the strongest functional connection as a  
10 dependent variable ignores the possibility that even very strong cortico-striatal connections are  
11 many-to-one (as is suggested by the identified subnetworks). Thus, the model may not accurately  
12 represent the brain’s true connectional organization. Importantly, both of these issues would be  
13 expected to reduce the variance explained of the stepped gradient model, but would not affect the  
14 continuous gradient model. The fact that the stepped model outperforms the gradient model despite  
15 these limitations is strong evidence that it more accurately represents the organization of fronto-  
16 striatal connections.

17

## 18 **Towards a Complete Description of Cortico-Striato-Thalamic Circuits and their Cross-Circuit** 19 **Integration**

20 It is well established in rodents and non-human primates that cortico-striatal circuits are further  
21 projected to the thalamus, and then back to cortex to form feedback loops (Haber, 2003; Nakano et  
22 al., 2000). Thus, in principle the cortico-striatal subnetwork structures we observe here should also  
23 have representation in the thalamus. While we did observe this representation to some degree, the  
24 thalamus did not consistently contain representations of all cortico-striatal subnetworks; and further,  
25 the thalamus tended to have extensive representation of subnetworks characterized as noise-  
26 related. This suggests that the quality of the MSC fMRI data, while adequate for winner-take-all

1 style whole-network mapping in thalamus (Greene et al., 2020), may not be adequate for the data-  
2 driven mapping of highly specific cortico-striato-thalamo-cortical circuits in thalamus. Future work  
3 may be able to more broadly conduct such mapping using such higher-quality data collected with  
4 advanced multiband sequences.

5 While the presented delineations of cortico-striatal circuits are neurobiologically compelling and  
6 individual-specific, they are incomplete. In examining only the very strongest functional connections  
7 to each striatal voxel, we focus on the likely driving inputs to the striatum, but we also exclude the  
8 wealth of multi-lobe, modulatory inputs to striatum that have been described in humans (Choi et al.,  
9 2012; Greene et al., 2020, 2014; Parkes et al., 2017) and non-human primates (Selemon and  
10 Goldman-Rakic, 1985; Yeterian and Van Hoesen, 1978). The current results also represent these  
11 circuits as if they are fully segregated from each other. However, non-human primate studies have  
12 demonstrated that fronto-striatal circuits are only partially segregated, with some degree of cross-  
13 circuit connections (Haber, 2003). Similarly, at the large-scale network level, human RSFC work  
14 has also demonstrated cross-network integration zones (Greene et al., 2020). In reproducing  
15 analyses from (Greene et al., 2020) at the subnetwork level rather than the network level, we  
16 similarly observed extensive cross-subnetwork connections (Fig S4). Untangling the substantial  
17 complexity of these multi-subnetwork connections for comprehensive evaluation and categorization  
18 must be conducted in future work.

19

## 20 **Mapping Discrete Cortico-Striatal Circuits in Individual Humans**

21 In describing cortico-striatal organization as a stepped gradient composed of discrete  
22 subnetworks, the present results have important implications for the future study of the human  
23 striatum. The discrete subnetworks present within the striatum likely enable a variety of different  
24 cognitive and motor processes that can be localized to each separate, individual-specific striatal  
25 network structure. With such localization, we can generate strong hypotheses about how individual-  
26 specific symptoms observed in neuropsychiatric disorders might arise from disruption of those

1 specific fronto-striatal circuits, or about how neurodegenerative diseases or brain injuries that  
2 damage specific fronto-striatal circuits would impair associated cognitive and motor functions. We  
3 can then explore whether symptoms can be alleviated or impaired function restored via brain  
4 stimulation approaches, including noninvasive TMS targeting the cortical sources of these fronto-  
5 striatal projections, or deep electrode implantation targeting their striatal targets.  
6

## 1 METHODS

### 2 3 **Subjects**

4 Data were collected from ten healthy, right-handed, young adult subjects (5 females; age: 24-  
5 34). Two of the subjects are authors (NUFD and SMN), and the remaining subjects were recruited  
6 from the Washington University community. Informed consent was obtained from all participants.  
7 The study was approved by the Washington University School of Medicine Human Studies  
8 Committee and Institutional Review Board. Other findings using these participants have been  
9 previously reported in (Gordon et al., 2017c; Gratton et al., 2018; Greene et al., 2020; Marek et al.,  
10 2018; Sylvester et al., 2020).

### 11 12 **MRI image acquisition**

13 Imaging for each subject was performed on a Siemens TRIO 3T MRI scanner over the course of  
14 12 sessions conducted on separate days, each beginning at midnight. Structural MRI was  
15 conducted across two separate days. In total, four T1-weighted images (sagittal, 224 slices, 0.8 mm  
16 isotropic resolution, TE=3.74 ms, TR=2400 ms, TI=1000 ms, flip angle = 8 degrees), four T2-  
17 weighted images (sagittal, 224 slices, 0.8 mm isotropic resolution, TE=479 ms, TR=3200 ms), four  
18 MRA (transverse, 0.6 x 0.6, x 1.0mm, 44 slices, TR=25ms, TE=3.34ms) and eight MRVs, including  
19 four in coronal and four in sagittal orientations (sagittal: 0.8 x 0.8 x 2.0mm thickness, 120 slices,  
20 TR=27ms, TE=7.05ms; coronal: 0.7 x 0.7 x 2.5mm thickness, 128 slices, TR=28ms TE= 7.18ms),  
21 were obtained for each subject. Analyses of the MRA and MRV scans are not reported here.

22 On ten subsequent days, each subject underwent 1.5 hours of functional MRI scanning  
23 beginning at midnight. In each session, we first collected thirty contiguous minutes of resting state  
24 fMRI data, in which subjects visually fixated on a white crosshair presented against a black  
25 background. Each subject was then scanned during performance of three separate tasks, which are  
26 not examined here. Across all sessions, each subject was scanned for 300 total minutes during the  
27 resting state. All functional imaging was performed using a gradient-echo EPI sequence (TR = 2.2  
28 s, TE = 27 ms, flip angle = 90°, voxel size = 4 mm x 4 mm x 4 mm, 36 slices). In each session, one  
29 gradient echo field map sequence was acquired with the same prescription as the functional  
30 images. An EyeLink 1000 eye-tracking system (<http://www.sr-research.com>) allowed continuous  
31 monitoring of subjects' eyes in order to check for periods of prolonged eye closure, potentially  
32 indicating sleep. Only one subject (MSC08) demonstrated prolonged eye closures.

### 33 34 **Cortical surface generation**

35 Generation of cortical surfaces from the MRI data followed a procedure similar to that previously  
36 described in (Marek et al., 2018). First, anatomical surfaces were generated from the subject's  
37 average T1-weighted image in native volumetric space using FreeSurfer's default recon-all  
38 processing pipeline (version 5.3). This pipeline first conducted brain extraction and segmentation.  
39 After this step, segmentations were hand-edited to maximize accuracy. Subsequently, the  
40 remainder of the recon-all pipeline was conducted on the hand-edited segmentations, including  
41 generation of white matter and pial surfaces, inflation of the surfaces to a sphere, and surface  
42 shape-based spherical registration of the subject's original surface to the fsaverage surface (Dale et  
43 al., 1999; Fischl et al., 1999). The fsaverage-registered left and right hemisphere surfaces were  
44 brought into register with each other using deformation maps from a landmark-based registration of  
45 left and right fsaverage surfaces to a hybrid left-right fsaverage surface ('fs\_LR'; Van Essen et al.,  
46 2012). These fs\_LR spherical template meshes were input to a flexible Multi-modal surface  
47 Matching (MSM) algorithm using sulc features to register templates to the atlas mesh (Robinson et  
48 al., 2014). These newly registered surfaces were then down-sampled to a 32,492 vertex surface  
49 (fs\_LR 32k) for each hemisphere. The various structural metric data (thickness, curvature, etc.)  
50 from the original surfaces to the fs\_LR 32k surface were composed into a single deformation map  
51 allowing for one step resampling. MSM registration provided a more optimal fit of pial and white

1 surfaces and reduced areal distortion (Glasser et al., 2016b). These various surfaces in native  
2 stereotaxic space were then transformed into atlas space (711-2B) by applying the previously  
3 calculated T1-to-atlas transformation.

#### 4 5 **fMRI Preprocessing**

6 Functional data were preprocessed to reduce artifacts and to maximize cross-session  
7 registration. All sessions underwent correction of odd vs. even slice intensity differences attributable  
8 to interleaved acquisition, intensity normalization to a whole brain mode value of 1000, and within  
9 run correction for head movement. Atlas transformation was computed by registering the mean  
10 intensity image from a single BOLD session to Talairach atlas space (Talairach and Tournoux,  
11 1988) via the average high-resolution T2-weighted image and average high-resolution T1-weighted  
12 image. All subsequent BOLD sessions were linearly registered to this first session. This atlas  
13 transformation, mean field distortion correction (see below), and resampling to 2-mm isotropic atlas  
14 space were combined into a single interpolation using FSL's applywarp tool (Smith et al., 2004). All  
15 subsequent operations were performed on the atlas-transformed volumetric time series.

#### 16 17 **Distortion correction**

18 A mean field map was generated based on the field maps collected in each subject (Laumann  
19 et al., 2015). This mean field map was then linearly registered to each session and applied to that  
20 session for distortion correction. To generate the mean field map the following procedure was used:  
21 (1) Field map magnitude images were mutually co-registered. (2) Transforms between all sessions  
22 were resolved. Transform resolution reconstructs the  $n-1$  transforms between all images using the  
23  $n(n-1)/2$  computed transform pairs. (3) The resolved transforms were applied to generate a mean  
24 magnitude image. (4) The mean magnitude image was registered to an atlas representative  
25 template. (5) Individual session magnitude image to atlas space transforms were computed by  
26 composing the session-to-mean and mean-to-atlas transforms. (6) Phase images were then  
27 transformed to atlas space using the composed transforms, and a mean phase image in atlas  
28 space was computed.

29 Application of mean field map to individual fMRI sessions: (1) For each session, field map  
30 uncorrected data were registered to atlas space, as above. (2) The generated transformation matrix  
31 was then inverted and applied to the mean field map to bring the mean field map into the session  
32 space. (3) The mean field map was used to correct distortion in each native-space run of resting  
33 state and task data in the session. (4) The undistorted data were then re-registered to atlas space.  
34 (5) This new transformation matrix and the mean field map then were applied together to resample  
35 each run of resting state and task data in the session to undistorted atlas space in a single step.

#### 36 37 **RSFC Preprocessing**

38 Additional preprocessing steps to reduce spurious variance unlikely to reflect neuronal activity  
39 were executed as recommended in (Ciric et al., 2017; Power et al., 2014). First, temporal masks  
40 were created to flag motion-contaminated frames. We observed that two subjects (MSC 03 and  
41 MSC 10) had a high-frequency artifact in the motion estimates calculated in the phase encode  
42 (anterior-posterior) direction that did not appear to reflect biological movement. We thus filtered the  
43 motion estimate time courses in this direction only to retain effects occurring below 0.1 Hz in all  
44 subjects for consistency (Gratton et al., 2019). Motion contaminated volumes were then identified  
45 by frame-by-frame displacement (FD). Frames with  $FD > 0.2\text{mm}$  were flagged as motion-  
46 contaminated. Across all subjects, these masks censored  $28\% \pm 18\%$  (range: 6% – 67%) of the  
47 data; on average, subjects retained  $5929 \pm 1508$  volumes (range: 2733 – 7667), corresponding to  
48  $217 \pm 55$  minutes (range: 100 – 281).

49 After computing the temporal masks for high motion frame censoring, the data were processed  
50 with the following steps: (i) demeaning and detrending, (ii) linear interpolation across censored  
51 frames using so that continuous data can be passed through (iii) a band-pass filter ( $0.005\text{ Hz} < f <$



1 0.01 Hz) without re-introducing nuisance signals (Hallquist et al., 2013) or contaminating frames  
2 near high motion frames (Carp, 2013).

3 Next, the filtered BOLD time series underwent a component-based nuisance regression  
4 approach (Marek et al., 2018). Nuisance regression using time series extracted from white matter  
5 and cerebrospinal fluid (CSF) assumes that variance in such regions is unlikely to reflect neural  
6 activity. Variance in these regions is known to correspond largely to physiological noise (e.g., CSF  
7 pulsations), arterial pCO<sub>2</sub>-dependent changes in T<sub>2</sub>\*-weighted intensity and motion artifact; this  
8 spurious variance is widely shared with regions of interest in gray matter. We also included the  
9 mean signal averaged over the whole brain as a nuisance regressor. Global signal regression  
10 (GSR) has been controversial. However, the available evidence indicates that GSR is a highly  
11 effective de-noising strategy (Ciric et al., 2017; Power et al., 2015).

12 Nuisance regressors were extracted from white matter and ventricle masks, first segmented by  
13 FreeSurfer (Fischl, 2012), then spatially resampled in register with the fMRI data. Voxels  
14 surrounding the edge of the brain are particularly susceptible to motion artifacts and CSF pulsations  
15 (Patriat et al., 2015; Satterthwaite et al., 2013); hence, a third nuisance mask was created for the  
16 extra-axial compartment by thresholding the temporal standard deviation image (SDt > 2.5%),  
17 excluding a dilated whole brain mask. Voxel-wise nuisance time series were dimensionality reduced  
18 as in CompCor (Behzadi et al., 2007), except that the number of retained regressors, rather than  
19 being a fixed quantity, was determined, for each noise compartment, by orthogonalization of the  
20 covariance matrix and retaining components ordered by decreasing eigenvalue up to a condition  
21 number of 30 (max eigenvalue / min eigenvalue > 30). The retained components across all  
22 compartments formed the columns of a design matrix, X, along with the global signal, its first  
23 derivative, and the six time series derived by retrospective motion correction. The columns of X are  
24 likely to exhibit substantial co-linearity. Therefore, to prevent numerical instability owing to rank-  
25 deficiency during nuisance regression, a second-level SVD was applied to  $XX^T$  to impose an upper  
26 limit of 250 on the condition number. This final set of regressors was applied in a single step to the  
27 filtered, interpolated BOLD time series, with censored data ignored during beta estimation. Finally,  
28 the data were upsampled to 2mm isotropic voxels. Censored frames were then excised from the  
29 data for all subsequent analyses.

### 31 **Surface processing and CIFTI generation of BOLD data**

32 Surface processing of BOLD data proceeded through the following steps. First, the BOLD fMRI  
33 volumetric timeseries were sampled to each subject's original mid-thickness left and right-  
34 hemisphere surfaces (generated as the average of the white and pial surfaces) using the ribbon-  
35 constrained sampling procedure available in Connectome Workbench 1.0. This procedure samples  
36 data from voxels within the gray matter ribbon (i.e., between the white and pial surfaces) that lie in a  
37 cylinder orthogonal to the local mid-thickness surface weighted by the extent to which the voxel falls  
38 within the ribbon. Voxels with a timeseries coefficient of variation 0.5 standard deviations higher  
39 than the mean coefficient of variation of nearby voxels (within a 5 mm sigma Gaussian  
40 neighborhood) were excluded from the volume to surface sampling, as described in (Glasser et al.,  
41 2013). Once sampled to the surface, timecourses were deformed and resampled from the  
42 individual's original surface to the 32k fs\_LR surface in a single step using the deformation map  
43 generated above (in "Cortical surface generation"). This resampling allows point-to-point  
44 comparison between each individual registered to this surface space.

45 These surfaces were then combined with volumetric subcortical and cerebellar data into the  
46 CIFTI format using Connectome Workbench (Marcus et al., 2011), creating full brain timecourses  
47 excluding non-gray matter tissue. Subcortical (including accumbens, amygdala, caudate,  
48 hippocampus, pallidum, putamen, and thalamus) and cerebellar voxels were selected based on the  
49 FreeSurfer segmentation of the individual subject's native-space average T1, transformed into atlas  
50 space, and manually inspected. Finally, the BOLD timecourses were smoothed with a geodesic 2D  
51 (for surface data) or Euclidean 3D (for volumetric data) Gaussian kernel of  $\sigma = 2.55$  mm.



1  
2  
3  
4  
5  
6  
7  
8  
9

## **Regression of adjacent cortical tissue from RSFC BOLD**

Some striatal regions, particularly including lateral putamen, are in close anatomical proximity to cortex, resulting in spurious functional coupling between the cortical vertices and adjacent subcortical voxels. To reduce this artifact, RSFC BOLD time series from all vertices falling within 20mm Euclidean distance of a source voxel were averaged and then regressed from the voxel time series (Buckner et al., 2011; Greene et al., 2020; Marek et al., 2018). The resulting residual timeseries were used for all subsequent analyses.

## **Mapping multi-scale network structure**

The network organization of each subject's brain was delineated following (Gordon et al., 2020) using the graph-theory-based Infomap algorithm for community detection (Rosvall and Bergstrom, 2008). In this approach, we calculated the cross-correlation matrix of the time courses from all brain vertices (on the cortical surfaces) and voxels (in subcortical structures), concatenated across sessions. Correlations between vertices/voxels within 30 mm of each other were set to zero in this matrix to avoid basing network membership on correlations attributable to spatial smoothing. Geodesic distance was used for within-hemisphere surface connections and Euclidean distance for subcortical-to-cortical connections. Connections between subcortical structures were disallowed, as we observed extremely high connectivities within nearly the entire basal ganglia that would prevent network structures from emerging. Inter-hemispheric connections between the cortical surfaces were retained, as smoothing was not performed across the mid-sagittal plane.

We observed that connectivity patterns within regions known to have low BOLD signal due to susceptibility artifact dropout (e.g. ventral anterior temporal lobe, portions of orbitofrontal cortex) were effectively random. To avoid having the delineated network structures distorted by such random connections, we first calculated a set of common low-signal regions as the vertices in which the average mode-1000 normalized BOLD signal across subjects and timepoints was less than 750 (as in Gordon et al., 2016; Wig et al., 2014). All connections to these low-signal regions were set to zero.

This matrix was then thresholded to retain at least the strongest .1% of connections to each vertex and voxel, following observations in (Gordon et al., 2020) that this level of network division represents divisions that, across these subjects, optimally divide the resting state data and explain task activation patterns.

These thresholded matrices were used as inputs for the Infomap algorithm, which calculated community assignments (representing brain network structures) separately for each threshold. Small networks with 10 or fewer vertices / voxels were considered unassigned and removed from further consideration. The above analysis was conducted in each individual subject.

## **Identifying matched striatal subnetworks in individuals**

For each subject, we considered only subnetworks that had at least some representation in the striatum (the individually defined caudate, putamen, nucleus accumbens, and globus pallidus). Following (Gordon et al., 2020), we visually examined the cortical and subcortical topographies of each subnetwork with striatal representation, as well as their topological arrangement relative to each other. After careful consideration of the subnetworks observable in this population, matched subnetworks were identified based on the following heuristic rules:

A subnetwork in inferior ventral striatum usually also had representation in subgenual cingulate and/or orbitofrontal cortex.

A subnetwork in anterior ventral striatum had representation in bilateral pregenual cingulate cortex. This subnetwork was previously described in (Gordon et al., 2020).

A subnetwork in superior ventral striatum had representation in anterior cingulate cortex and middle insula.

1 A subnetwork that was spatially variable within striatum, with representation most often in  
2 medial putamen, but was consistently present in dorsal anterior cingulate cortex and dorsal insula.

3 A subnetwork in lateral middle putamen and posterior dorsomedial prefrontal cortex.

4 A subnetwork in dorsal caudate that had consistent representation as the dorsomedial cluster of  
5 the Fronto-Parietal network and inconsistent representation in lateral frontal and parietal cortex.

6 A subnetwork in medial anterior putamen (especially left putamen) that had consistent cortical  
7 representation converging with the Language network (Braga et al., 2020).

8 A subnetwork in lateral anterior caudate (especially left caudate) that had representation to a set  
9 of cortical regions directly anterior to the Language network above.

10 A subnetwork (sometimes multiple subnetworks) in ventral posterior putamen that had  
11 representation somewhere in the central sulcus, with the location of the representation varying  
12 substantially by subject.

13 Additionally, we commonly observed subnetworks that were generally in posterior lateral  
14 putamen (but with variable representation across subjects) that had cortical representation only in  
15 middle insular cortex, physically adjacent to the striatal representation, or (in one subject) in  
16 unusual locations such as medial occipital lobe. These subnetworks also often cut implausibly  
17 across disjoint anatomical structures such as putamen and thalamus. These subnetworks were  
18 tentatively classified as noise-related and were ignored for future analyses.

## 19 20 **Computing lobe-wise striatal subnetwork representation**

21 For each individual subject, we defined the Frontal, Insular, Parietal, Temporal, and Occipital  
22 lobes based on the lobe identities of the regions of the subject-specific Freesurfer-generated  
23 Destrieux atlas parcellation, which was deformed into fs\_LR\_32k space to match the functional  
24 data. Lobe-wise representation was computed within each subject as the percent of cortical vertices  
25 among all non-noise subnetworks that were within each lobe.

## 26 27 **Visualizing subnetwork overlap across subjects**

28 For each matched non-noise subnetwork, the overlap across individuals was visualized using  
29 Connectome Workbench. For cortex, the number of individuals with the subnetwork present was  
30 calculated in each vertex. For striatum, this was less straightforward, as the subcortical structures  
31 were individualized, and so were different shapes and sizes across people. To represent overlap in  
32 striatum, we first mapped the subcortical voxels of each individual among MSC02-10 to the  
33 subcortical structures in MSC01. This was done by assigning each voxel in the MSC01 structures  
34 the network ID of the nearest (by Euclidean distance) subcortical voxel in that individual. Overlap  
35 was then calculated across MSC01-space subject subnetworks as the number of individuals with  
36 the subnetwork present in each MSC01-space voxel.

## 37 38 **Defining position along a rostral-caudal axis in striatum and frontal cortex**

39 For each subject, we calculated four separate curves to fit the rostral-caudal orientation of 1)  
40 bilateral caudate, 2) left putamen, 3) right putamen, and 4) frontal cortex.

41 For caudate, the structure is oriented vertically, and the rostral-caudal organization is best  
42 represented as a curve running from ventral striatum up through caudate head and back to caudate  
43 tail—that is, a curve in the y and z dimensions, with the x dimension irrelevant. We thus created a  
44 rostral-caudal axis as a lowess curve fit to the y- and z-coordinates of the caudate voxels. This  
45 curve represents the approximate geometric center of the structure in the y and z dimensions. In  
46 the dorsal posterior portion of the caudate (body and tail), the rostral-caudal organization is simply  
47 anterior-to-posterior. Therefore, once the curve reached the maximum z coordinate of the structure,  
48 the lowess fit was terminated and the axis was continued by projecting straight backwards along the  
49 y axis. For this fitting, nucleus accumbens was combined with caudate. Additionally, left and right  
50 caudate were combined, as the difference between the left and right structures (in the x-axis) was  
51 irrelevant for the fit.

1 For putamen, the structure is oriented horizontally, and thus the rostral-caudal organization is  
2 best represented as a curve in the x and y dimensions, with the z dimension irrelevant. Thus, as  
3 with caudate, we created a rostral-caudal axis as a lowess curve fitted to the x- and y-coordinates  
4 of the putamen voxels, representing the approximate geometric center of the structure in the x and  
5 y dimensions. Once the curve reached the maximum x coordinate of the structure, the lowess fit  
6 was terminated and the axis was continued by projecting straight backwards along the y axis.  
7 Because the left and right putamen are mirrored in the x dimension (rather than oriented  
8 equivalently, as with the caudate z dimension), the fit was necessarily conducted separately for the  
9 left and right structures. For this analysis, globus pallidus was not included in the fit.

10 For frontal cortex, the structure is oriented vertically, as with caudate. Therefore, as with  
11 caudate, we created a rostral-caudal axis as a lowess curve fit to the y- and z-coordinates of the  
12 cortical vertices in the frontal cortex. For each subject, frontal cortex was defined using the subject-  
13 specific Destrieux atlas parcellation, as above, except that we also included anterior insula regions,  
14 which commonly included substantial representation of striatal networks (excluding insula regions  
15 did not change the results; see Fig S5B). As with caudate, we terminated the curve and projected  
16 backwards along the y axis once the curve reached the maximum z coordinate.

17 Finally, we calculated the coordinate of each striatal voxel and each cortical vertex along the  
18 rostral-caudal axis. First, the distances along the four rostral-caudal fit curve axes were converted  
19 to rank value (rank within each curve) to ensure comparability across structures. Then, for each  
20 voxel / vertex, the rostral-caudal coordinate was taken to be the rank of the point on the relevant  
21 structure's rostral-caudal axis closest (i.e. minimum Euclidean distance) to that voxel/vertex. Note  
22 that this calculation—the closest point on the relevant axis—is identical to how x/y/z axis  
23 coordinates are defined in a standard 3D space.

24 In each case, rostral-caudal positions were converted to rank order along the rostral-caudal  
25 gradient to account for nonuniform effects of position.  
26

## 27 **Examining continuous and discrete organizations of strong fronto-striatal connections**

28 We conducted two separate sets of analyses: One in which we identified the most strongly  
29 connected striatal target voxel for each frontal cortex source vertex, and the second in which we  
30 identified the most strongly connected frontal source vertex for each striatal target voxel.

### 31 Regression Set 1: Cortex→Striatum

32 For each frontal cortex vertex, we identified the striatal voxel with which it had the strongest  
33 functional connection. This was done by calculating correlations between the timecourses of all  
34 subcortical voxels and all frontal cortex vertices (frontal cortex defined as above). For each frontal  
35 vertex, the striatal voxel with the most strongly correlated timecourse was taken to be that vertex's  
36 "target"—the voxel most likely to be directly anatomically connected to that voxel. Voxels with  
37 correlations to their sources that were weaker than  $R=.2$  were considered too weak to be reliable  
38 and were excluded from subsequent analyses. However, inclusion of these voxels does not change  
39 the results; see Fig S5A.

40 We tested which factors of a frontal source vertex explain the rostral-caudal position of its  
41 striatal target. We first tested whether fronto-striatal connections could appear to be a continuous  
42 rostral-caudal gradient, in which continuous movement from vertex to vertex along the frontal cortex  
43 rostral-caudal axis is mirrored by a continuous rostral-caudal movement of those vertices' striatal  
44 targets. Specifically, separately in each subject, we tested whether the rostral-caudal position of  
45 cortical vertices was correlated with the rostral-caudal position of their striatal targets. We evaluated  
46 this effect as the adjusted square of the correlation value ( $R^2$ ), representing the variance in striatal  
47 voxel position explained by cortical target position, corrected for the use of the single regressor.

48 We then tested whether fronto-striatal connections could appear as a stepped gradient  
49 composed of discrete networks, in which the location of a striatal target voxel is explained by the  
50 network of its frontal source vertex. Specifically, separately in each subject, we conducted a one-  
51 way ANOVA with the network identity of frontal vertices as an independent variable and the rostral-

1 caudal position of their striatal targets as the dependent variable. We evaluated this effect as the  
2 adjusted  $R^2$  of the main factor of the ANOVA, representing the variance in striatal target position  
3 explained by frontal vertex network ID, corrected for the number of levels in the ANOVA. Note that  
4 this adjusted  $R^2$  value is directly comparable to the adjusted  $R^2$  value from the correlation above.  
5 Finally, we tested whether fronto-striatal connections could appear as a continuous or a stepped  
6 rostral-caudal gradient when accounting for the other organization, as well as which organization  
7 explained more variance. Separately in each subject, we conducted a one-way ANCOVA with the  
8 network identity of frontal vertices as one discrete independent variable, the rostral-caudal position  
9 of frontal vertices as a second, continuous variable, and the rostral-caudal position of the striatal  
10 targets as the dependent variable. The explanatory power of each factor (continuous gradient vs  
11 discrete network) was compared against each other by calculating and computing the adjusted  $R^2$   
12 of each factor within the ANCOVA.

### 13 14 Regression Set 2: Striatum→Cortex

15 These regressions were conducted using the same logic as above, but using the striatal voxels  
16 as independent variables and the frontal vertices as dependent variables. Specifically, for each  
17 striatal voxel, we identified the frontal cortex vertex with which it had the strongest functional  
18 connection. This was done as above by calculating correlations between the timecourses of all  
19 subcortical voxels and all frontal cortex vertices. For each voxel, the cortical vertex with the most  
20 strongly correlated timecourse was taken to be its “source”. Voxels with correlations to their sources  
21 that were weaker than  $R=.2$  were excluded from subsequent analyses (again, inclusion of these  
22 voxels does not change results; Fig S5A).

23 We tested which factors of a striatal target voxel explain the rostral-caudal position of its frontal  
24 source. We first tested whether the rostral-caudal position of striatal voxels was correlated with the  
25 rostral-caudal position of their frontal sources. We evaluated this effect as the adjusted square of  
26 the correlation value ( $R^2$ ), representing the variance in frontal vertex position explained by striatal  
27 voxel position, corrected for the use of the single regressor.

28 We then tested whether the location of a frontal source vertex is explained by the network of its  
29 striatal target voxel by conducting a one-way ANOVA with the network identity of striatal voxels as  
30 an independent variable and the rostral-caudal position of their frontal sources as the dependent  
31 variable. We evaluated this effect as the adjusted  $R^2$  of the main factor of the ANOVA, representing  
32 the variance in frontal source position explained by striatal voxel network ID, corrected for the  
33 number of levels in the ANOVA. This adjusted  $R^2$  value is directly comparable to the adjusted  $R^2$   
34 value from the correlation above.

35 Finally, we tested whether fronto-striatal connections could appear as a continuous or a stepped  
36 rostral-caudal gradient when accounting for the other organization. Separately in each subject, we  
37 conducted a one-way ANCOVA with the network identity of striatal voxels as one discrete  
38 independent variable, the rostral-caudal position of striatal voxels as a second, continuous variable,  
39 and the rostral-caudal position of the frontal source vertices as the dependent variable. The  
40 explanatory power of each factor was compared against each other by calculating and computing  
41 the adjusted  $R^2$  of each factor within the ANCOVA.

42  
43  
44

## 45 **DATA AND SOFTWARE AVAILABILITY**

46 Data: Raw MRI data from the MSC Dataset, as well as segmented cortical surfaces,  
47 preprocessed volumetric and cifti-space RSFC timecourses, and preprocessed task timecourses  
48 and contrasts, have been deposited in the Openneuro data repository  
49 (<https://openneuro.org/datasets/ds000224/versions/1.0.2>) under the label “Midnight Scan Club”.

50 Code: Code to perform all preprocessing and analysis is available at  
51 <https://github.com/MidnightScanClub>.



## 1 REFERENCES

- 2 Amunts K, Zilles K. 2015. Architectonic Mapping of the Human Brain beyond Brodmann. *Neuron*  
3 **88**:1086–1107.
- 4 Arikuni T, Kubota K. 1986. The organization of prefrontocaudate projections and their laminar  
5 origin in the macaque monkey: A retrograde study using HRP-gel. *Journal of*  
6 *Comparative Neurology* **244**:492–510.
- 7 Averbeck BB, Lehman J, Jacobson M, Haber SN. 2014. Estimates of Projection Overlap and  
8 Zones of Convergence within Frontal-Striatal Circuits. *J Neurosci* **34**:9497–9505.
- 9 Badre D, Frank MJ. 2012. Mechanisms of Hierarchical Reinforcement Learning in Cortico–  
10 Striatal Circuits 2: Evidence from fMRI. *Cereb Cortex* **22**:527–536.
- 11 Baliki MN, Mansour A, Baria AT, Huang L, Berger SE, Fields HL, Apkarian AV. 2013. Parceling  
12 Human Accumbens into Putative Core and Shell Dissociates Encoding of Values for  
13 Reward and Pain. *J Neurosci* **33**:16383–16393.
- 14 Baumann S, Petkov CI, Griffiths TD. 2013. A unified framework for the organization of the  
15 primate auditory cortex. *Front Syst Neurosci* **7**.
- 16 Behzadi Y, Restom K, Liu J, Liu TT. 2007. A component based noise correction method  
17 (CompCor) for BOLD and perfusion based fMRI. *NeuroImage* **37**:90–101.
- 18 Bijsterbosch JD, Woolrich MW, Glasser MF, Robinson EC, Beckmann CF, Essen DCV,  
19 Harrison SJ, Smith SM. 2018. The relationship between spatial configuration and  
20 functional connectivity of brain regions. *eLife Sciences* **7**:e32992.
- 21 Biswal BB, Yetkin FZ, Haughton VM, Hyde JS. 1995. Functional connectivity in the motor cortex  
22 of resting human brain using echo-planar MRI. *Magn Reson Med* **34**:537–41.
- 23 Blumenstock S, Dudanova I. 2020. Cortical and Striatal Circuits in Huntington’s Disease. *Front*  
24 *Neurosci* **14**:82.
- 25 Boecker H, Dagher A, Ceballos-Baumann AO, Passingham RE, Samuel M, Friston KJ, Poline J-  
26 B, Dettmers C, Conrad B, Brooks DJ. 1998. Role of the Human Rostral Supplementary  
27 Motor Area and the Basal Ganglia in Motor Sequence Control: Investigations With H2  
28 <sup>15</sup>O PET. *Journal of Neurophysiology* **79**:1070–1080.
- 29 Borsini A, Wallis ASJ, Zunszain P, Pariante CM, Kempton MJ. 2020. Characterizing anhedonia:  
30 A systematic review of neuroimaging across the subtypes of reward processing deficits  
31 in depression. *Cogn Affect Behav Neurosci* **20**:816–841.
- 32 Braga RM, Buckner RL. 2017. Parallel Interdigitated Distributed Networks within the Individual  
33 Estimated by Intrinsic Functional Connectivity. *Neuron* **95**:457-471.e5.
- 34 Braga RM, DiNicola LM, Buckner RL. 2020. Situating the Left-Lateralized Language Network in  
35 the Broader Organization of Multiple Specialized Large-Scale Distributed Networks.  
36 *Journal of Neurophysiology* **124**:1415–1448.
- 37 Brodmann K. 1909. Vergleichende Lokalisationslehre der Grosshirnrinde in ihren Prinzipien  
38 dargestellt auf Grund des Zellenbaues. Leipzig: Barth.
- 39 Buckner RL, Krienen FM, Castellanos A, Diaz JC, Yeo BTT. 2011. The organization of the  
40 human cerebellum estimated by intrinsic functional connectivity. *J Neurophysiol*  
41 **106**:2322–2345.
- 42 Bunner KD, Rebec GV. 2016. Corticostriatal Dysfunction in Huntington’s Disease: The Basics.  
43 *Front Hum Neurosci* **10**.
- 44 Calzavara R, Maily P, Haber SN. 2007. Relationship between the corticostriatal terminals from  
45 areas 9 and 46, and those from area 8A, dorsal and rostral premotor cortex and area  
46 24c: an anatomical substrate for cognition to action. *European Journal of Neuroscience*  
47 **26**:2005–2024.
- 48 Carp J. 2013. Optimizing the order of operations for movement scrubbing: Comment on Power  
49 et al. *NeuroImage* **76**:436–438.

- 1 Cartmell SCD, Tian Q, Thio BJ, Leuze C, Ye L, Williams NR, Yang G, Ben-Dor G, Deisseroth K,  
2 Grill WM, McNab JA, Halpern CH. 2019. Multimodal characterization of the human  
3 nucleus accumbens. *NeuroImage* **198**:137–149.
- 4 Cavada C, Goldman-Rakic PS. 1991. Topographic segregation of corticostriatal projections  
5 from posterior parietal subdivisions in the macaque monkey. *Neuroscience* **42**:683–696.
- 6 Cheng K, Saleem KS, Tanaka K. 1997. Organization of corticostriatal and corticoamygdalar  
7 projections arising from the anterior inferotemporal area TE of the macaque monkey: a  
8 Phaseolus vulgaris leucoagglutinin study. *J Neurosci* **17**:7902–7925.
- 9 Chikama M, McFarland NR, Amaral DG, Haber SN. 1997. Insular cortical projections to  
10 functional regions of the striatum correlate with cortical cytoarchitectonic organization in  
11 the primate. *J Neurosci* **17**:9686–9705.
- 12 Choi EY, Drayna GK, Badre D. 2018. Evidence for a Functional Hierarchy of Association  
13 Networks. *Journal of Cognitive Neuroscience* **30**:722–736.
- 14 Choi EY, Yeo BTT, Buckner RL. 2012. The organization of the human striatum estimated by  
15 intrinsic functional connectivity. *J Neurophysiol* **108**:2242–2263.
- 16 Churchland PS, Sejnowski TJ. 1988. Perspectives on cognitive neuroscience. *Science*  
17 **242**:741–745.
- 18 Ciric R, Wolf DH, Power JD, Roalf DR, Baum G, Ruparel K, Shinohara RT, Elliott MA, Eickhoff  
19 SB, Davatzikos C, Gur RC, Gur RE, Bassett DS, Satterthwaite TD. 2017. Benchmarking  
20 of participant-level confound regression strategies for the control of motion artifact in  
21 studies of functional connectivity. *Neuroimage* **154**:174–187.
- 22 Cohen AL, Fair DA, Dosenbach NUF, Miezin FM, Dierker D, Van Essen DC, Schlaggar BL,  
23 Petersen SE. 2008. Defining functional areas in individual human brains using resting  
24 functional connectivity MRI. *NeuroImage* **41**:45–57.
- 25 Cohen MX, Frank MJ. 2009. Neurocomputational models of basal ganglia function in learning,  
26 memory and choice. *Behavioural Brain Research*, Special issue on the role of the basal  
27 ganglia in learning and memory **199**:141–156.
- 28 Corballis MC. 2012. Chapter 6 - Lateralization of the human brain In: Hofman MA, Falk D,  
29 editors. *Progress in Brain Research, Evolution of the Primate Brain*. Elsevier. pp. 103–  
30 121.
- 31 Dale AM, Fischl B, Sereno MI. 1999. Cortical Surface-Based Analysis: I. Segmentation and  
32 Surface Reconstruction. *NeuroImage* **9**:179–194.
- 33 Di Martino A, Scheres A, Margulies DS, Kelly AMC, Uddin LQ, Shehzad Z, Biswal B, Walters  
34 JR, Castellanos FX, Milham MP. 2008. Functional Connectivity of Human Striatum: A  
35 Resting State fMRI Study. *Cereb Cortex* **18**:2735–2747.
- 36 Dick AS, Tremblay P. 2012. Beyond the arcuate fasciculus: consensus and controversy in the  
37 connectional anatomy of language. *Brain* **135**:3529–3550.
- 38 Draganski B, Kherif F, Klöppel S, Cook PA, Alexander DC, Parker GJM, Deichmann R,  
39 Ashburner J, Frackowiak RSJ. 2008. Evidence for Segregated and Integrative  
40 Connectivity Patterns in the Human Basal Ganglia. *J Neurosci* **28**:7143–7152.
- 41 Drevets WC, Savitz J, Trimble M. 2008. The Subgenual Anterior Cingulate Cortex in Mood  
42 Disorders. *CNS Spectr* **13**:663–681.
- 43 Feilong M, Nastase SA, Guntupalli JS, Haxby JV. 2018. Reliable individual differences in fine-  
44 grained cortical functional architecture. *Neuroimage* **183**:375–386.
- 45 Felleman DJ, Van Essen DC. 1991. Distributed Hierarchical Processing in the Primate. *Cereb*  
46 *Cortex* **1**:1–47.
- 47 Fischl B. 2012. FreeSurfer. *NeuroImage*, 20 YEARS OF fMRI **62**:774–781.
- 48 Fischl B, Sereno MI, Dale AM. 1999. Cortical Surface-Based Analysis: II: Inflation, Flattening,  
49 and a Surface-Based Coordinate System. *NeuroImage* **9**:195–207.
- 50 Flaherty AW, Graybiel AM. 1994. Input-output organization of the sensorimotor striatum in the  
51 squirrel monkey. *J Neurosci* **14**:599–610.

- 1 Frank MJ, Loughry B, O'Reilly RC. 2001. Interactions between frontal cortex and basal ganglia  
2 in working memory: A computational model. *Cognitive, Affective, & Behavioral*  
3 *Neuroscience* **1**:137–160.
- 4 Friederici AD. 2017. Evolution of the neural language network. *Psychon Bull Rev* **24**:41–47.
- 5 Friederici AD. 2011. The Brain Basis of Language Processing: From Structure to Function.  
6 *Physiological Reviews* **91**:1357–1392.
- 7 Friederici AD, Gierhan SM. 2013. The language network. *Current Opinion in Neurobiology*,  
8 *Macrocircuits* **23**:250–254.
- 9 Friederici AD, Rüschemeyer S-A, Hahne A, Fiebach CJ. 2003. The Role of Left Inferior Frontal  
10 and Superior Temporal Cortex in Sentence Comprehension: Localizing Syntactic and  
11 Semantic Processes. *Cereb Cortex* **13**:170–177.
- 12 Glasser MF, Coalson TS, Robinson EC, Hacker CD, Harwell J, Yacoub E, Ugurbil K, Andersson  
13 J, Beckmann CF, Jenkinson M, Smith SM, Van Essen DC. 2016a. A multi-modal  
14 parcellation of human cerebral cortex. *Nature* **536**:171–178.
- 15 Glasser MF, Smith SM, Marcus DS, Andersson JLR, Auerbach EJ, Behrens TEJ, Coalson TS,  
16 Harms MP, Jenkinson M, Moeller S, Robinson EC, Sotiropoulos SN, Xu J, Yacoub E,  
17 Ugurbil K, Van Essen DC. 2016b. The Human Connectome Project's neuroimaging  
18 approach. *Nat Neurosci* **19**:1175–1187.
- 19 Glasser MF, Sotiropoulos SN, Wilson JA, Coalson TS, Fischl B, Andersson JL, Xu J, Jbabdi S,  
20 Webster M, Polimeni JR, Van Essen DC, Jenkinson M, WU-Minn HCP Consortium.  
21 2013. The minimal preprocessing pipelines for the Human Connectome Project.  
22 *Neuroimage* **80**:105–124.
- 23 Gordon EM, Laumann TO, Adeyemo B, Gilmore AW, Nelson SM, Dosenbach NUF, Petersen  
24 SE. 2017a. Individual-specific features of brain systems identified with resting state  
25 functional correlations. *NeuroImage* **146**:918–939.
- 26 Gordon EM, Laumann TO, Adeyemo B, Huckins JF, Kelley WM, Petersen SE. 2016. Generation  
27 and Evaluation of a Cortical Area Parcellation from Resting-State Correlations. *Cereb*  
28 *Cortex* **26**:288–303.
- 29 Gordon EM, Laumann TO, Adeyemo B, Petersen SE. 2017b. Individual Variability of the  
30 System-Level Organization of the Human Brain. *Cereb Cortex* **27**:386–399.
- 31 Gordon EM, Laumann TO, Gilmore AW, Newbold DJ, Greene DJ, Berg JJ, Ortega M, Hoyt-  
32 Drazen C, Gratton C, Sun H, Hampton JM, Coalson RS, Nguyen AL, McDermott KB,  
33 Shimony JS, Snyder AZ, Schlaggar BL, Petersen SE, Nelson SM, Dosenbach NUF.  
34 2017c. Precision Functional Mapping of Individual Human Brains. *Neuron* **95**:791–807.
- 35 Gordon EM, Laumann TO, Marek S, Raut RV, Gratton C, Newbold DJ, Greene DJ, Coalson RS,  
36 Snyder AZ, Schlaggar BL, Petersen SE, Dosenbach NUF, Nelson SM. 2020. Default-  
37 mode network streams for coupling to language and control systems. *PNAS* **117**:17308–  
38 17319.
- 39 Gratton C, Coalson RS, Dworketsky A, Adeyemo B, Laumann TO, Wig GS, Kong TS, Gratton G,  
40 Fabiani M, Barch DM, Tranel D, Miranda-Dominguez O, Fair DA, Dosenbach NUF,  
41 Snyder AZ, Perlmuter JS, Petersen SE, Campbell MC. 2019. Removal of high  
42 frequency contamination from motion estimates in single-band fMRI saves data without  
43 biasing functional connectivity. *bioRxiv* 837161.
- 44 Gratton C, Laumann TO, Nielsen AN, Greene DJ, Gordon EM, Gilmore AW, Nelson SM,  
45 Coalson RS, Snyder AZ, Schlaggar BL, Dosenbach NUF, Petersen SE. 2018. Functional  
46 brain networks are dominated by stable group and individual factors, not cognitive or  
47 daily variation. *Neuron* **98**:439–452.
- 48 Greene DJ, Laumann TO, Dubis JW, Ihnen SK, Neta M, Power JD, Pruett JR, Black KJ,  
49 Schlaggar BL. 2014. Developmental Changes in the Organization of Functional  
50 Connections between the Basal Ganglia and Cerebral Cortex. *J Neurosci* **34**:5842–  
51 5854.

- 1 Greene DJ, Marek S, Gordon EM, Siegel JS, Gratton C, Laumann TO, Gilmore AW, Berg JJ,  
2 Nguyen AL, Dierker D, Van AN, Ortega M, Newbold DJ, Hampton JM, Nielsen AN,  
3 McDermott KB, Roland JL, Norris SA, Nelson SM, Snyder AZ, Schlaggar BL, Petersen  
4 SE, Dosenbach NUF. 2020. Integrative and Network-Specific Connectivity of the Basal  
5 Ganglia and Thalamus Defined in Individuals. *Neuron* **105**:742–758.
- 6 Greene DJ, Williams lii AC, Koller JM, Schlaggar BL, Black KJ, The Tourette Association of  
7 America Neuroimaging Consortium. 2017. Brain structure in pediatric Tourette  
8 syndrome. *Mol Psychiatry* **22**:972–980.
- 9 Grillner S, Hellgren J, Ménard A, Saitoh K, Wikström MA. 2005. Mechanisms for selection of  
10 basic motor programs – roles for the striatum and pallidum. *Trends in Neurosciences*  
11 **28**:364–370.
- 12 Haber SN. 2016. Corticostriatal circuitry. *Dialogues Clin Neurosci* **18**:7–21.
- 13 Haber SN. 2003. The primate basal ganglia: parallel and integrative networks. *Journal of*  
14 *Chemical Neuroanatomy*, Special Issue on the Human Brain - The Structural Basis for  
15 understanding Human Brain function and dysfunction **26**:317–330.
- 16 Haber SN, Kim K-S, Mailly P, Calzavara R. 2006. Reward-Related Cortical Inputs Define a  
17 Large Striatal Region in Primates That Interface with Associative Cortical Connections,  
18 Providing a Substrate for Incentive-Based Learning. *J Neurosci* **26**:8368–8376.
- 19 Haber SN, Knutson B. 2010. The Reward Circuit: Linking Primate Anatomy and Human  
20 Imaging. *Neuropsychopharmacology* **35**:4–26.
- 21 Haber SN, Kunishio K, Mizobuchi M, Lynd-Balta E. 1995. The orbital and medial prefrontal  
22 circuit through the primate basal ganglia. *J Neurosci* **15**:4851–4867.
- 23 Hallquist MN, Hwang K, Luna B. 2013. The nuisance of nuisance regression: Spectral  
24 misspecification in a common approach to resting-state fMRI preprocessing reintroduces  
25 noise and obscures functional connectivity. *Neuroimage* **82**:208–225.
- 26 Harrison BJ, Soriano-Mas C, Pujol J, Ortiz H, López-Solà M, Hernández-Ribas R, Deus J,  
27 Alonso P, Yücel M, Pantelis C, Menchon JM, Cardoner N. 2009. Altered corticostriatal  
28 functional connectivity in obsessive-compulsive disorder. *Arch Gen Psychiatry* **66**:1189–  
29 1200.
- 30 Harrison SJ, Bijsterbosch JD, Segerdahl AR, Fitzgibbon SP, Duff E, Smith SM, Woolrich MW.  
31 2020. Modelling Subject Variability in the Spatial and Temporal Characteristics of  
32 Functional Modes. *NeuroImage* **222**:117226.
- 33 Harrison SJ, Woolrich MW, Robinson EC, Glasser MF, Beckmann CF, Jenkinson M, Smith SM.  
34 2015. Large-scale Probabilistic Functional Modes from resting state fMRI. *NeuroImage*  
35 **109**:217–231.
- 36 Huntenburg JM, Bazin P-L, Margulies DS. 2018. Large-Scale Gradients in Human Cortical  
37 Organization. *Trends in Cognitive Sciences* **22**:21–31.
- 38 Jarbo K, Verstynen TD. 2015. Converging Structural and Functional Connectivity of  
39 Orbitofrontal, Dorsolateral Prefrontal, and Posterior Parietal Cortex in the Human  
40 Striatum. *J Neurosci* **35**:3865–3878.
- 41 Jeon H-A, Anwander A, Friederici AD. 2014. Functional Network Mirrored in the Prefrontal  
42 Cortex, Caudate Nucleus, and Thalamus: High-Resolution Functional Imaging and  
43 Structural Connectivity. *J Neurosci* **34**:9202–9212.
- 44 Ji JL, Spronk M, Kulkarni K, Repovš G, Anticevic A, Cole MW. 2019. Mapping the human  
45 brain's cortical-subcortical functional network organization. *NeuroImage* **185**:35–57.
- 46 Koob GF, Volkow ND. 2016. Neurobiology of addiction: a neurocircuitry analysis. *The Lancet*  
47 *Psychiatry* **3**:760–773.
- 48 Kunishio K, Haber SN. 1994. Primate cingulostratial projection: Limbic striatal versus  
49 sensorimotor striatal input. *Journal of Comparative Neurology* **350**:337–356.
- 50 Künzle H. 1978. An Autoradiographic Analysis of the Efferent Connections from Premotor and  
51 Adjacent Prefrontal Regions (Areas 6 and 9) in *Macaca fascicularis*. *BBE* **15**:210–234.



- 1 Künzle H. 1975. Bilateral projections from precentral motor cortex to the putamen and other  
2 parts of the basal ganglia. An autoradiographic study in *Macaca fascicularis*. *Brain*  
3 *Research* **88**:195–209.
- 4 Laumann TO, Gordon EM, Adeyemo B, Snyder AZ, Joo SJ, Chen M-Y, Gilmore AW,  
5 McDermott KB, Nelson SM, Dosenbach NUF, Schlaggar BL, Mumford JA, Poldrack RA,  
6 Petersen SE. 2015. Functional System and Areal Organization of a Highly Sampled  
7 Individual Human Brain. *Neuron* **87**:657–670.
- 8 Leaver AM, Rauschecker JP. 2016. Functional Topography of Human Auditory Cortex. *J*  
9 *Neurosci* **36**:1416–1428.
- 10 Li M, Wang D, Ren J, Langs G, Stoecklein S, Brennan BP, Lu J, Chen H, Liu H. 2019.  
11 Performing group-level functional image analyses based on homologous functional  
12 regions mapped in individuals. *PLOS Biology* **17**:e2007032.
- 13 Li W, Pozzo-Miller L. 2019. Dysfunction of the corticostriatal pathway in autism spectrum  
14 disorders. *J Neurosci Res*.
- 15 Marcus D, Harwell J, Olsen T, Hodge M, Glasser M, Prior F, Jenkinson M, Laumann T, Curtiss  
16 S, Van Essen D. 2011. Informatics and Data Mining Tools and Strategies for the Human  
17 Connectome Project. *Front Neuroinform* **5**:4.
- 18 Marek S, Siegel JS, Gordon EM, Raut RV, Gratton C, Newbold DJ, Ortega M, Laumann TO,  
19 Adeyemo B, Miller DB, Zheng A, Lopez KC, Berg JJ, Coalson RS, Nguyen AL, Dierker  
20 D, Van AN, Hoyt CR, McDermott KB, Norris SA, Shimony JS, Snyder AZ, Nelson SM,  
21 Barch DM, Schlaggar BL, Raichle ME, Petersen SE, Greene DJ, Dosenbach NUF. 2018.  
22 Spatial and Temporal Organization of the Individual Human Cerebellum. *Neuron*  
23 **100**:977–993.
- 24 Margulies DS, Ghosh SS, Goulas A, Falkiewicz M, Huntenburg JM, Langs G, Bezgin G,  
25 Eickhoff SB, Castellanos FX, Petrides M, Jefferies E, Smallwood J. 2016. Situating the  
26 default-mode network along a principal gradient of macroscale cortical organization.  
27 *PNAS* 201608282.
- 28 Marquand AF, Haak KV, Beckmann CF. 2017. Functional corticostriatal connection  
29 topographies predict goal directed behaviour in humans. *Nat Hum Behav* **1**:0146.
- 30 Mestres-Missé A, Turner R, Friederici AD. 2012. An anterior–posterior gradient of cognitive  
31 control within the dorsomedial striatum. *NeuroImage* **62**:41–47.
- 32 Mink JW. 2001. Basal ganglia dysfunction in Tourette’s syndrome: a new hypothesis. *Pediatr*  
33 *Neurol* **25**:190–198.
- 34 Morris LS, Kundu P, Dowell N, Mechelmans DJ, Favre P, Irvine MA, Robbins TW, Daw N,  
35 Bullmore ET, Harrison NA, Voon V. 2016. Fronto-striatal organization: Defining  
36 functional and microstructural substrates of behavioural flexibility. *Cortex, What’s your*  
37 *poison? Neurobehavioural consequences of exposure to industrial, agricultural and*  
38 *environmental chemicals* **74**:118–133.
- 39 Nakano K, Kayahara T, Tsutsumi T, Ushiro H. 2000. Neural circuits and functional organization  
40 of the striatum. *J Neurol* **247**:V1–V15.
- 41 Nee DE, Brown JW. 2013. Dissociable Frontal–Striatal and Frontal–Parietal Networks Involved  
42 in Updating Hierarchical Contexts in Working Memory. *Cereb Cortex* **23**:2146–2158.
- 43 Ocklenburg S, Beste C, Arning L, Peterburs J, Güntürkün O. 2014. The ontogenesis of  
44 language lateralization and its relation to handedness. *Neuroscience & Biobehavioral*  
45 *Reviews* **43**:191–198.
- 46 O’Leary DDM, Chou S-J, Sahara S. 2007. Area Patterning of the Mammalian Cortex. *Neuron*  
47 **56**:252–269.
- 48 O’Rawe JF, Ide JS, Leung H-C. 2019. Model testing for distinctive functional connectivity  
49 gradients with resting-state fMRI data. *Neuroimage* **185**:102–110.
- 50 Parkes L, Fulcher BD, Yücel M, Fornito A. 2017. Transcriptional signatures of connectomic  
51 subregions of the human striatum. *Genes, Brain and Behavior* **16**:647–663.

- 1 Partiot A, Vérin M, Pillon B, Teixeira-Ferreira C, Agid Y, Dubois B. 1996. Delayed response  
2 tasks in basal ganglia lesions in man: Further evidence for a striato-frontal cooperation in  
3 behavioural adaptation. *Neuropsychologia* **34**:709–721.
- 4 Patriat R, Molloy EK, Birn RM. 2015. Using Edge Voxel Information to Improve Motion  
5 Regression for rs-fMRI Connectivity Studies. *Brain Connect* **5**:582–595.
- 6 Peters AJ, Fabre JM, Steinmetz NA, Harris KD, Carandini M. 2021. Striatal activity  
7 topographically reflects cortical activity. *Nature* 1–6.
- 8 Power JD, Cohen AL, Nelson SM, Wig GS, Barnes KA, Church JA, Vogel AC, Laumann TO,  
9 Miezin FM, Schlaggar BL, Petersen SE. 2011. Functional Network Organization of the  
10 Human Brain. *Neuron* **72**:665–678.
- 11 Power JD, Schlaggar BL, Petersen SE. 2015. Recent progress and outstanding issues in  
12 motion correction in resting state fMRI. *NeuroImage* **105**:536–551.
- 13 Power JD, Schlaggar BL, Petersen SE. 2014. Studying Brain Organization via Spontaneous  
14 fMRI Signal. *Neuron* **84**:681–696.
- 15 Raut RV, Snyder AZ, Raichle ME. 2020. Hierarchical dynamics as a macroscopic organizing  
16 principle of the human brain. *Proc Natl Acad Sci U S A* **117**:20890–20897.
- 17 Robinson EC, Jbabdi S, Glasser MF, Andersson J, Burgess GC, Harms MP, Smith SM, Van  
18 Essen DC, Jenkinson M. 2014. MSM: a new flexible framework for Multimodal Surface  
19 Matching. *Neuroimage* **100**:414–426.
- 20 Rosvall M, Bergstrom CT. 2008. Maps of random walks on complex networks reveal community  
21 structure. *PNAS* **105**:1118–1123.
- 22 Salgado S, Kaplitt MG. 2015. The Nucleus Accumbens: A Comprehensive Review. *SFN* **93**:75–  
23 93.
- 24 Satterthwaite TD, Elliott MA, Gerraty RT, Ruparel K, Loughhead J, Calkins ME, Eickhoff SB,  
25 Hakonarson H, Gur RC, Gur RE, Wolf DH. 2013. An improved framework for confound  
26 regression and filtering for control of motion artifact in the preprocessing of resting-state  
27 functional connectivity data. *Neuroimage* **64**:240–256.
- 28 Schultz W, Dickinson A. 2000. Neuronal Coding of Prediction Errors. *Annu Rev Neurosci*  
29 **23**:473–500.
- 30 Schultz W, Tremblay L, Hollerman JR. 1998. Reward prediction in primate basal ganglia and  
31 frontal cortex. *Neuropharmacology* **37**:421–429.
- 32 Sejnowski TJ, Churchland PS. 1989. Brain and cognition In: Posner MI, editor. Foundations of  
33 Cognitive Science. MIT Press, Cambridge, MA. p. 888.
- 34 Selemon LD, Goldman-Rakic PS. 1988. Common cortical and subcortical targets of the  
35 dorsolateral prefrontal and posterior parietal cortices in the rhesus monkey: evidence for  
36 a distributed neural network subserving spatially guided behavior. *J Neurosci* **8**:4049–  
37 4068.
- 38 Selemon LD, Goldman-Rakic PS. 1985. Longitudinal topography and interdigitation of  
39 corticostriatal projections in the rhesus monkey. *J Neurosci* **5**:776–794.
- 40 Sereno MI, Dale AM, Reppas JB, Kwong KK, Belliveau JW, Brady TJ, Rosen BR, Tootell RB.  
41 1995. Borders of multiple visual areas in humans revealed by functional magnetic  
42 resonance imaging. *Science* **268**:889–893.
- 43 Simpson EH, Kellendonk C, Kandel E. 2010. A possible role for the striatum in the pathogenesis  
44 of the cognitive symptoms of schizophrenia. *Neuron* **65**:585–596.
- 45 Smaers JB, Steele J, Case CR, Cowper A, Amunts K, Zilles K. 2011. Primate Prefrontal Cortex  
46 Evolution: Human Brains Are the Extreme of a Lateralized Ape Trend. *BBE* **77**:67–78.
- 47 Smith SM, Jenkinson M, Woolrich MW, Beckmann CF, Behrens TEJ, Johansen-Berg H,  
48 Bannister PR, De Luca M, Drobnjak I, Flitney DE, Niazy RK, Saunders J, Vickers J,  
49 Zhang Y, De Stefano N, Brady JM, Matthews PM. 2004. Advances in functional and  
50 structural MR image analysis and implementation as FSL. *NeuroImage* **23**:S208–S219.

- 1 Steele GE, Weller RE. 1993. Subcortical connections of subdivisions of inferior temporal cortex  
2 in squirrel monkeys. *Vis Neurosci* **10**:563–583.
- 3 Steiner H, Tseng KY. 2010. Handbook of Basal Ganglia Structure and Function. Academic  
4 Press.
- 5 Sylvester CM, Yu Q, Srivastava AB, Marek S, Zheng A, Alexopoulos D, Smyser CD, Shimony  
6 JS, Ortega M, Dierker DL, Patel GH, Nelson SM, Gilmore AW, McDermott KB, Berg JJ,  
7 Drysdale AT, Perino MT, Snyder AZ, Raut RV, Laumann TO, Gordon EM, Barch DM,  
8 Rogers CE, Greene DJ, Raichle ME, Dosenbach NUF. 2020. Individual-specific  
9 functional connectivity of the amygdala: A substrate for precision psychiatry. *PNAS*  
10 **117**:3808–18.
- 11 Talairach J, Tournoux P. 1988. Co-planar stereotaxic atlas of the human brain. New York:  
12 Thieme Medical Publishers, Inc.
- 13 Tziortzi AC, Haber SN, Searle GE, Tsoumpas C, Long CJ, Shotbolt P, Douaud G, Jbabdi S,  
14 Behrens TEJ, Rabiner EA, Jenkinson M, Gunn RN. 2014. Connectivity-Based Functional  
15 Analysis of Dopamine Release in the Striatum Using Diffusion-Weighted MRI and  
16 Positron Emission Tomography. *Cereb Cortex* **24**:1165–1177.
- 17 Van Essen DC, Glasser MF, Dierker DL, Harwell J, Coalson T. 2012. Parcellations and  
18 Hemispheric Asymmetries of Human Cerebral Cortex Analyzed on Surface-Based  
19 Atlases. *Cereb Cortex* **22**:2241–2262.
- 20 Van Hoesen GW, Yeterian EH, Lavizzo-Mourey R. 1981. Widespread corticostriate projections  
21 from temporal cortex of the rhesus monkey. *J Comp Neurol* **199**:205–219.
- 22 Verstynen TD, Badre D, Jarbo K, Schneider W. 2012. Microstructural organizational patterns in  
23 the human corticostriatal system. *Journal of Neurophysiology* **107**:2984–2995.
- 24 Vogelsang DA, D’Esposito M. 2018. Is There Evidence for a Rostral-Caudal Gradient in Fronto-  
25 Striatal Loops and What Role Does Dopamine Play? *Front Neurosci* **12**.
- 26 Wang D, Buckner RL, Fox MD, Holt DJ, Holmes AJ, Stoecklein S, Langs G, Pan R, Qian T, Li  
27 K, Baker JT, Stufflebeam SM, Wang K, Wang X, Hong B, Liu H. 2015. Parcellating  
28 cortical functional networks in individuals. *Nat Neurosci* **18**:1853–1860.
- 29 Webster MJ, Bachevalier J, Ungerleider LG. 1993. Subcortical connections of inferior temporal  
30 areas TE and TEO in macaque monkeys. *J Comp Neurol* **335**:73–91.
- 31 Wig GS, Laumann TO, Petersen SE. 2014. An approach for parcellating human cortical areas  
32 using resting-state correlations. *Neuroimage* **93**:276–291.
- 33 Xia X, Fan L, Cheng C, Eickhoff SB, Chen J, Li H, Jiang T. 2017. Multimodal connectivity-based  
34 parcellation reveals a shell-core dichotomy of the human nucleus accumbens. *Human*  
35 *Brain Mapping* **38**:3878–3898.
- 36 Yeo BTT, Krienen FM, Sepulcre J, Sabuncu MR, Lashkari D, Hollinshead M, Roffman JL,  
37 Smoller JW, Zöllei L, Polimeni JR, Fischl B, Liu H, Buckner RL. 2011. The organization  
38 of the human cerebral cortex estimated by intrinsic functional connectivity. *J*  
39 *Neurophysiol* **106**:1125–1165.
- 40 Yeterian EH, Pandya DN. 1998. Corticostriatal connections of the superior temporal region in  
41 rhesus monkeys. *J Comp Neurol* **399**:384–402.
- 42 Yeterian EH, Pandya DN. 1993. Striatal connections of the parietal association cortices in  
43 rhesus monkeys. *J Comp Neurol* **332**:175–197.
- 44 Yeterian EH, Pandya DN, Tomaiuolo F, Petrides M. 2012. The cortical connectivity of the  
45 prefrontal cortex in the monkey brain. *Cortex, Frontal lobes* **48**:58–81.
- 46 Yeterian EH, Van Hoesen GW. 1978. Cortico-striate projections in the rhesus monkey: The  
47 organization of certain cortico-caudate connections. *Brain Research* **139**:43–63.
- 48 Zeharia N, Hertz U, Flash T, Amedi A. 2015. New Whole-Body Sensory-Motor Gradients  
49 Revealed Using Phase-Locked Analysis and Verified Using Multivoxel Pattern Analysis  
50 and Functional Connectivity. *J Neurosci* **35**:2845–2859.

- 1 Zhang J, Abiose O, Katsumi Y, Touroutoglou A, Dickerson BC, Barrett LF. 2019. Intrinsic
- 2 Functional Connectivity is Organized as Three Interdependent Gradients. *Sci Rep*
- 3 **9**:15976.

### **Acknowledgements:**

1 This work was supported by NIH grants F31NS110332 (D.J.N.), NS088590 (N.U.F.D.),  
2 TR000448 (N.U.F.D.), MH1000872 (T.O.L.), 1R25MH112473 (T.O.L.), 5T32 MH100019-02  
3 (S.M.), MH104592 (D.J.G.), 1P30NS098577 (to the Neuroimaging Informatics and Analysis  
4 Center); Kiwanis Neuroscience Research Foundation (N.U.F.D. and B.L.S.); the Jacobs  
5 Foundation grant 2016121703 (N.U.F.D.); the Child Neurology Foundation (N.U.F.D.);  
6 the McDonnell Center for Systems Neuroscience (N.U.F.D. and B.L.S.); the Mallinckrodt  
7 Institute of Radiology grant 14-011 (N.U.F.D.); the Hope Center for Neurological Disorders  
8 (N.U.F.D., B.L.S., and S.E.P.). The views expressed in this article are those of the authors and  
9 do not necessarily reflect the position or policy of the Department of Veterans Affairs or the U.S.  
10 government.

### **Contributions:**

11 DJG, SMN, JMH, AMN, and NUFD collected the data. EMG, TOL, SMN, DJG, and AZS  
12 processed and analyzed the data. EMG, SMN, and NUFD wrote the paper with input from all  
13 authors.

### **Declaration of Interests:**

14 The authors declare no competing interests.

## Supplemental Materials

| Color in Figures | Striatal representation                                                                                                          | Cortical representation                                                                                                   | Mode large-scale network | Notes                                                                                       |
|------------------|----------------------------------------------------------------------------------------------------------------------------------|---------------------------------------------------------------------------------------------------------------------------|--------------------------|---------------------------------------------------------------------------------------------|
| Magenta          | Posterior putamen                                                                                                                | Variable locations in central sulcus                                                                                      | Motor                    |                                                                                             |
| Light green      | Lateral middle putamen                                                                                                           | Posterior dorsomedial prefrontal cortex                                                                                   | Cingulo-opercular        |                                                                                             |
| Pink             | Anterior medial putamen, sometimes lateral caudate head                                                                          | Dorsomedial prefrontal, inferior frontal (pars opercularis and/or orbitalis), posterior middle frontal, superior temporal | Language                 | Lateralized; cortical distribution looks like language network                              |
| Yellow           | Medial caudate head, anterior medial putamen                                                                                     | Dorsomedial prefrontal cortex, anterior middle insula                                                                     | Fronto-parietal          | Cortical representations highly punctate                                                    |
| Brown            | Anterior globus pallidus and anterior or medial putamen                                                                          | Dorsal anterior cingulate<br>Dorsal anterior insula                                                                       | Cingulo-opercular        | Striatal representations generally have poor overlap                                        |
| Purple           | Ventral caudate and/or anterior ventral putamen                                                                                  | Anterior cingulate<br>Middle insula                                                                                       | Saliency                 |                                                                                             |
| Light Blue       | Anterior medial ventral striatum                                                                                                 | Pregenua cingulate<br>Ventral anterior insula (8/10)                                                                      | Saliency                 |                                                                                             |
| Dark red         | Inferior nucleus accumbens                                                                                                       | Orbitofrontal cortex (8/10 subs)<br>Subgenual cingulate (6/10)                                                            | Default                  | Subgenual cluster sometimes very small                                                      |
| Dark green       | Lateral anterior caudate, medial to location of medial putamen subnetwork above                                                  | Adjacent to location of medial putamen subnetwork above                                                                   | Default                  | Not found in 2/10 subjects because it was incorporated into medial putamen subnetwork above |
| Orange           | Dorsal caudate                                                                                                                   | Dorsomedial prefrontal cortex<br>Lateral prefrontal cortex                                                                | Fronto-parietal          | Lateral prefrontal representation punctate in 4/10 subjects, very extensive in 6/10         |
| Dark gray        | Inconsistent regions in posterior lateral putamen; often cut implausibly across disjoint structures such as putamen and thalamus | Inconsistent regions in middle insula (adjacent to putamen representation), or, in 1/10 subjects, occipital lobe          | N/A                      | Interpreted as noise-related                                                                |

**Table S1:** For each identified subnetwork, description of locations of common appearance within striatum and cortex, as well as which large-scale network the subnetwork was most commonly contained within.



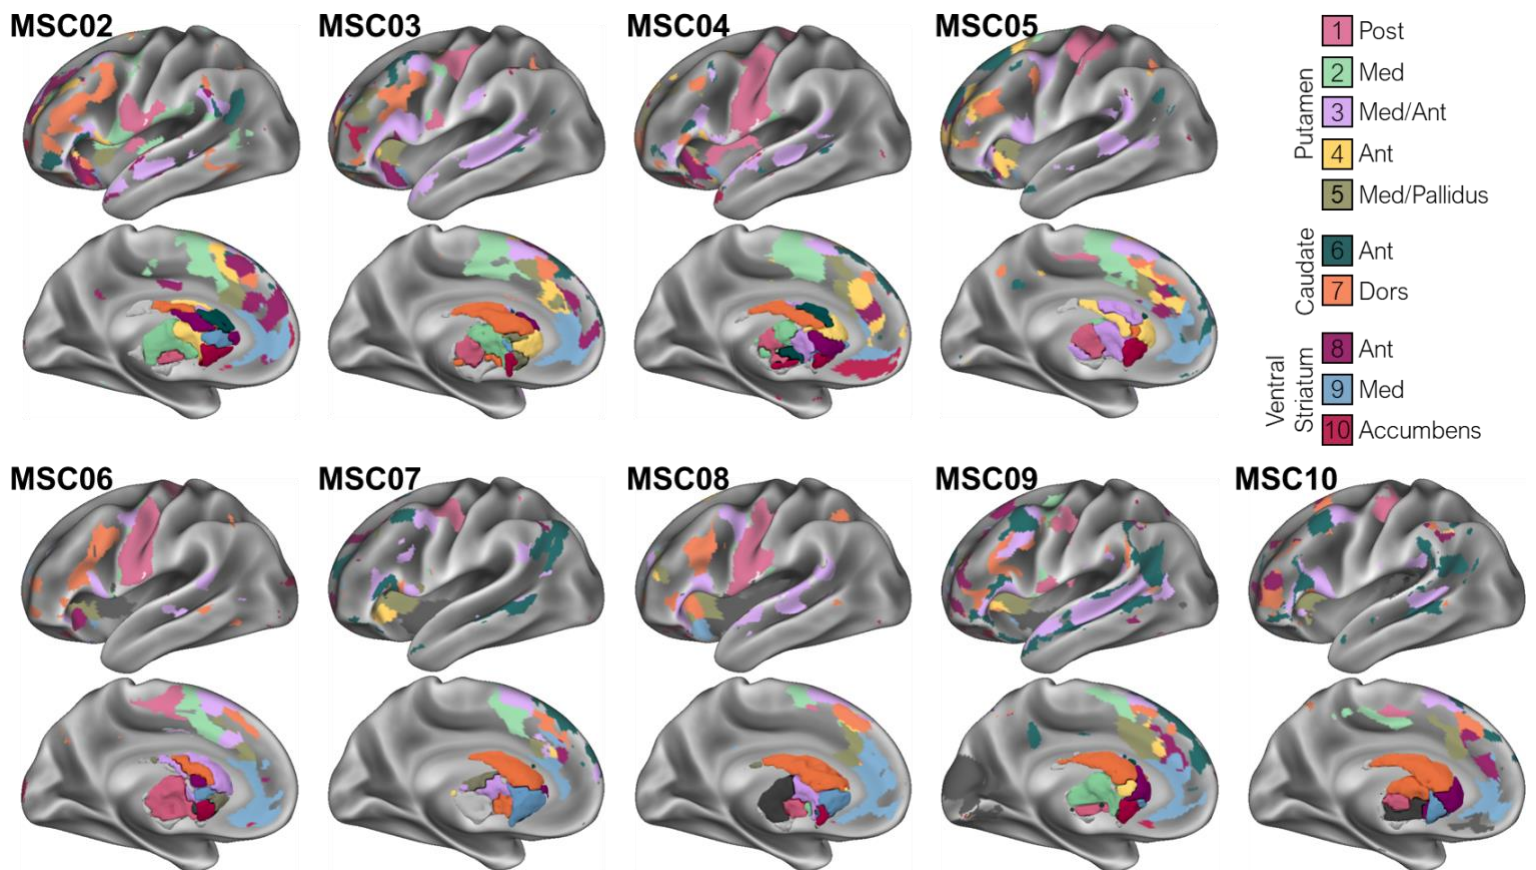

**Figure S1:** Representation of matched striatal subnetworks in subjects MSC02-10 within left hemisphere cortex and striatum.

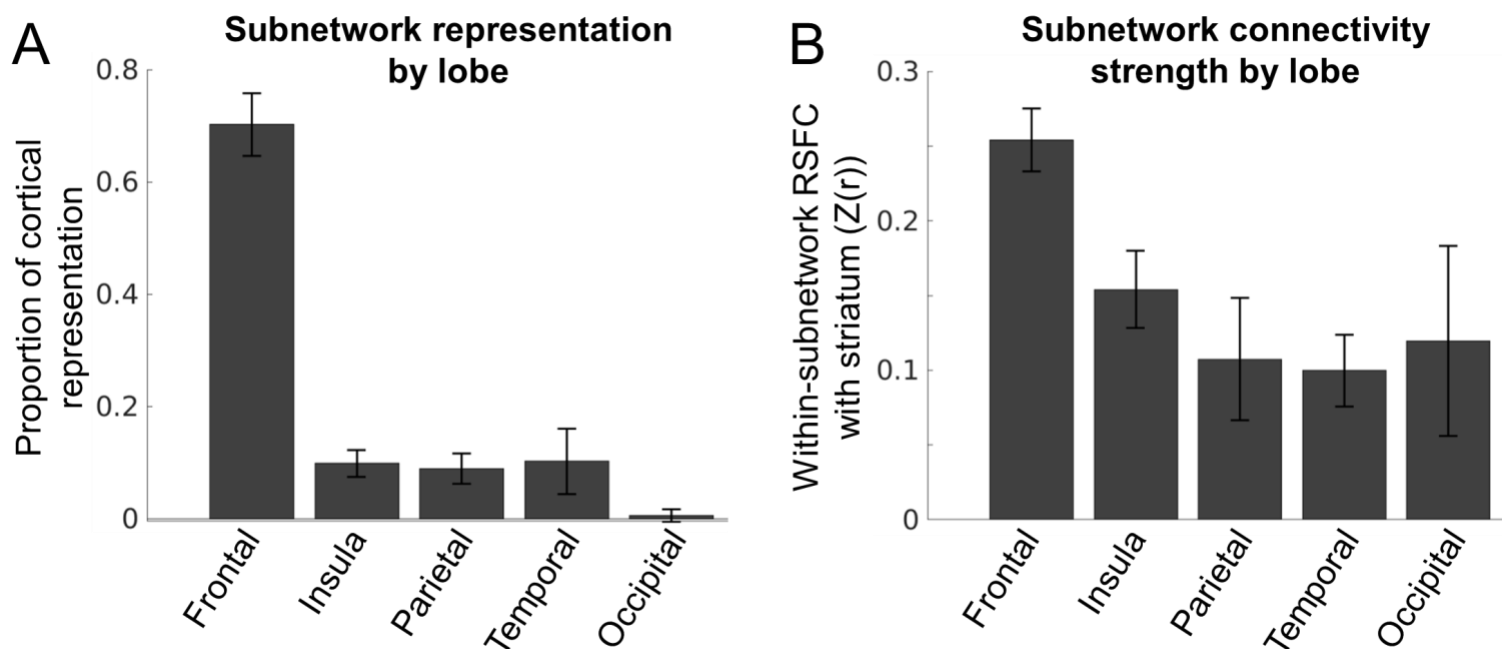

**Figure S2: Striatal subnetworks are primarily connected to frontal cortex.** A) Percent of cortical subnetwork vertices present within each cortical lobe, averaged across subnetworks and subjects. B) Strength of within-subnetwork functional connectivity between striatum and the vertices within each cortical lobe, averaged across subnetworks and subjects. Error bars represent standard deviation across subjects.

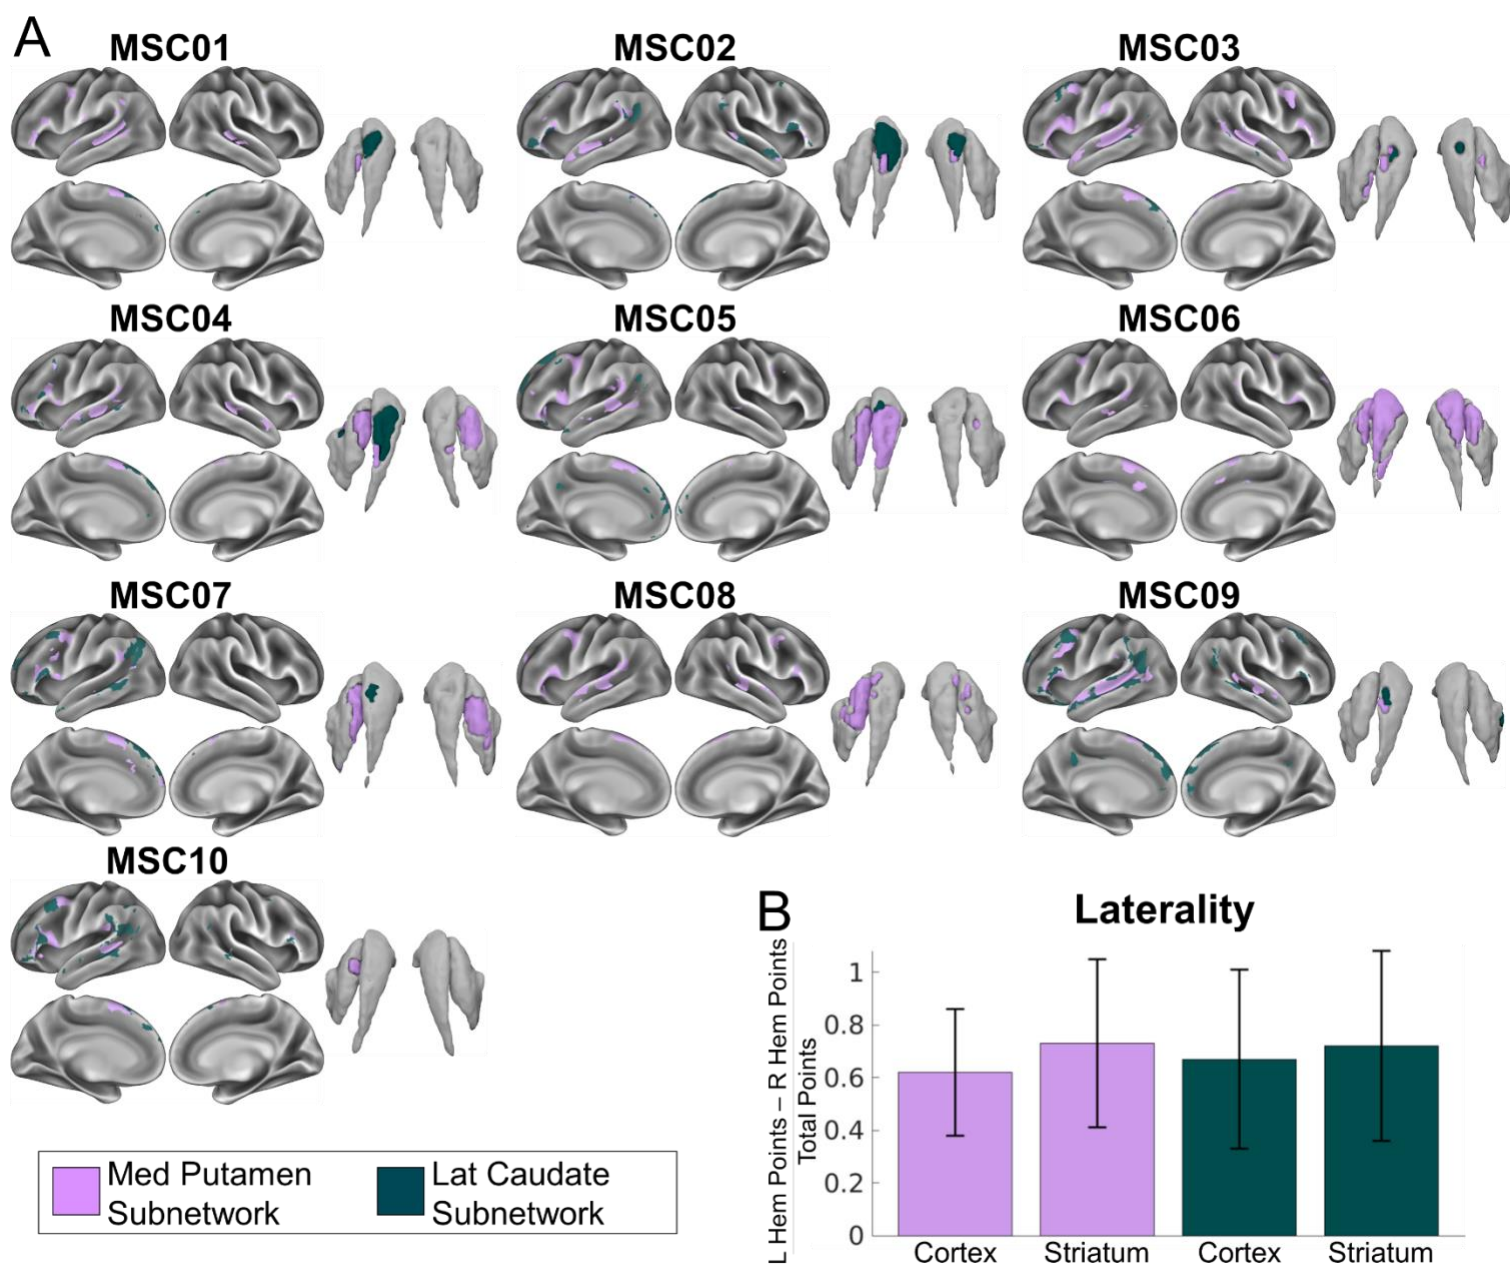

**Figure S3: Lateralized cortico-striatal subnetworks consistent with human language networks.** A) In each subject, bilateral cortical and striatal representations of two subnetworks consistent with known human language networks. B) Both subnetworks were lateralized (with greater representation in left than right hemisphere) in both cortex and striatum in every subject. No other subnetwork was consistently lateralized across subjects.

## MSC01

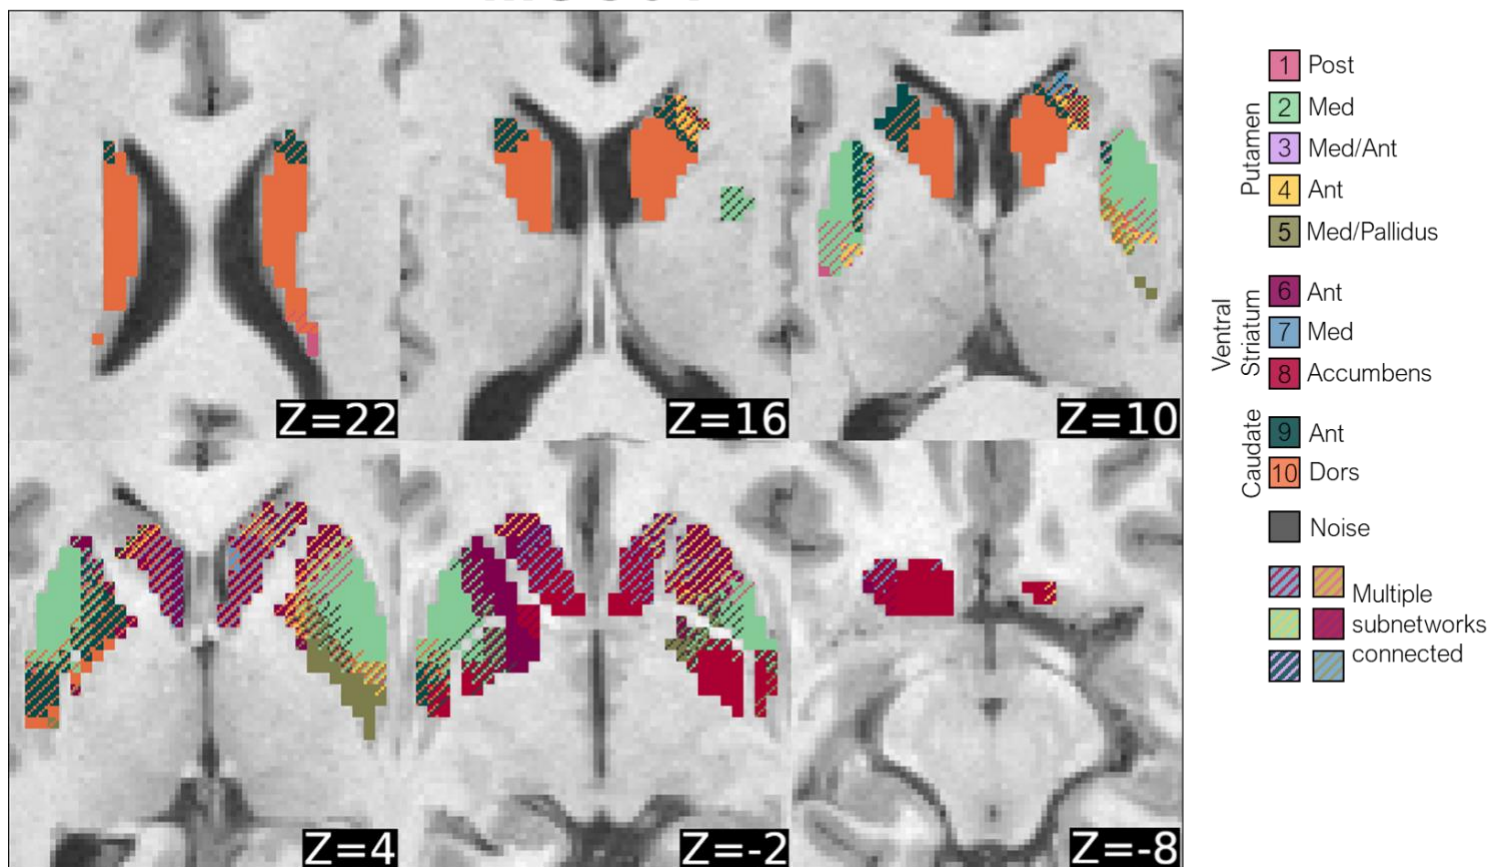

**Figure S4:** Cross-subnetwork integration in subject MSC01. Voxels with preferential RSFC to one network (network-specific) are represented by solid colors, and voxels functionally connected to multiple networks (integrative) are represented by cross-hatching. Analyses performed following procedures in Greene et al. (2020), except that we evaluated voxel RSFC to matched fronto-striatal subjects rather than to whole networks.



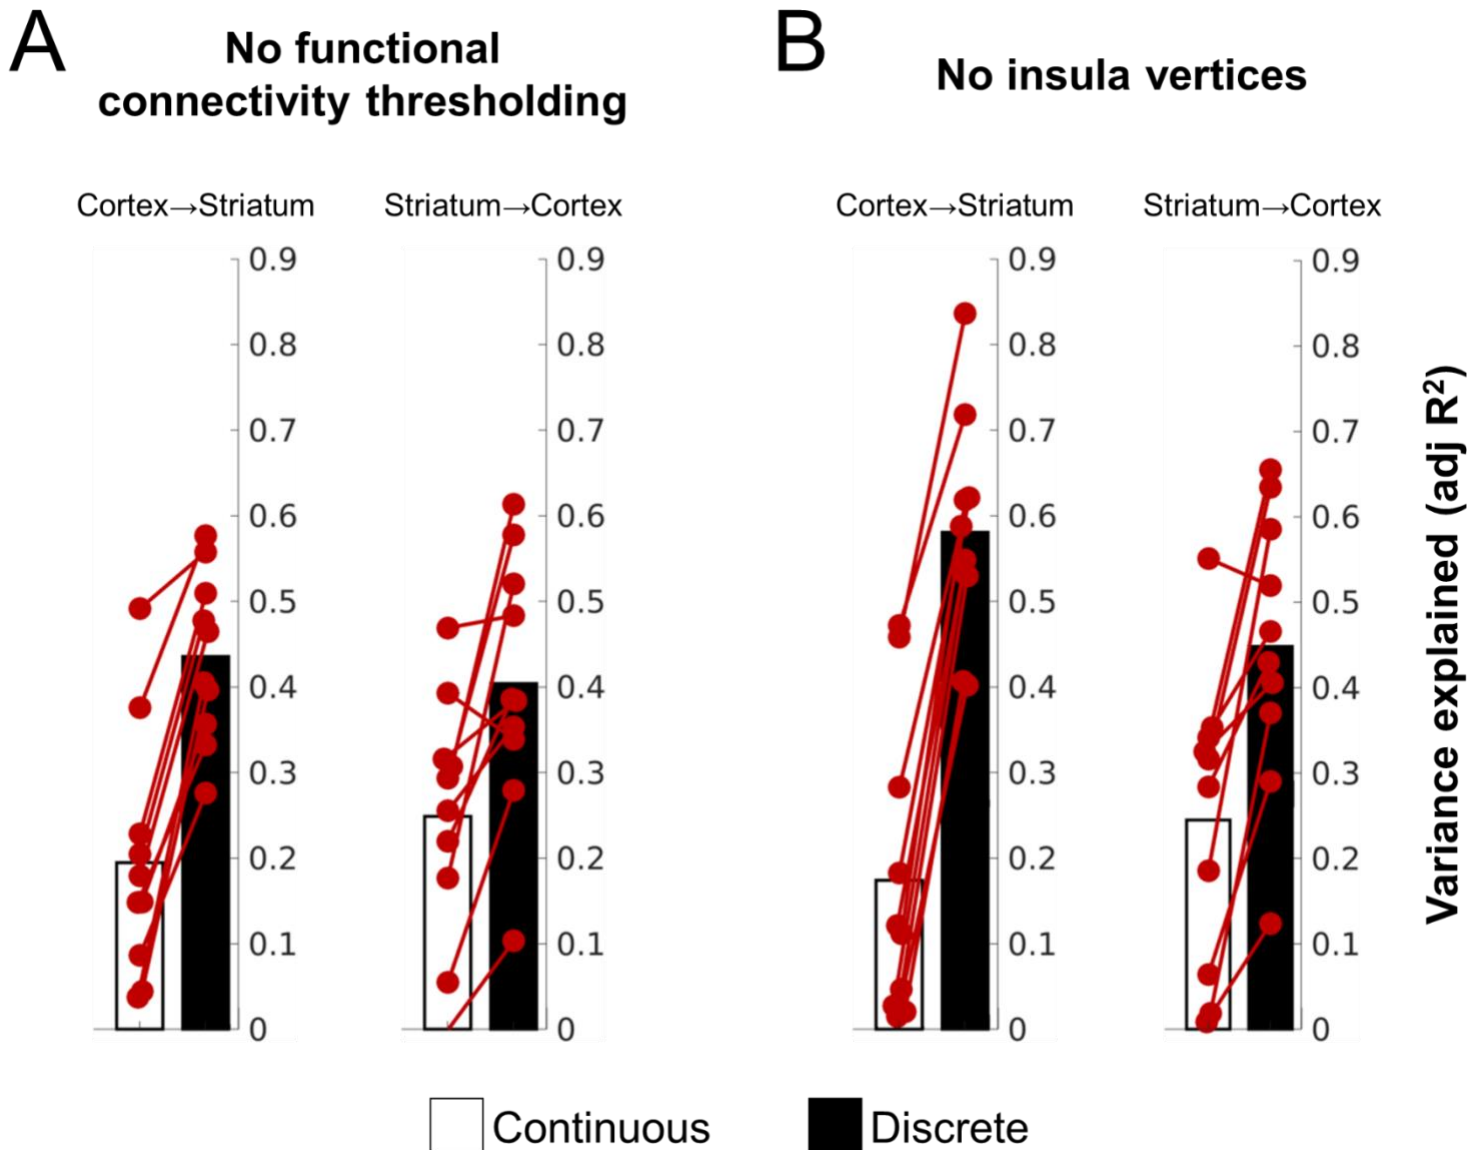

**Figure S5:** Fronto-striatal organization explained by continuous and stepped gradients after alternate analysis procedures. A) With no minimum RSFC thresholding (minimum RSFC set to  $Z(r)=.2$  in main text analyses), discrete network identity explained more variance than continuous rostral-caudal position for both the Cortex→Striatum (left) and the Striatum→Cortex (right) analyses. B) After excluding anterior insula voxels from consideration, discrete network identity explained more variance than continuous rostral-caudal position for both the Cortex→Striatum (left) and the Striatum→Cortex (right) analyses.
